# Supplementary material for: The first whole transcriptomic exploration of pre-oviposited early chicken embryos using single and bulked embryonic RNA-sequencing
Source: PubMed Central journal article supplement (PMC5893961; doi:10.1093/gigascience/giy030), 2018-03-24

## The first whole transcriptomic exploration of pre-oviposited early chicken embryos using single and bulked embryonic RNA-sequencing --Manuscript Draft--

|                                                      |                                                                                                                                                                                                                                                                                                                                                                                                                                                                                                                                                                                                                                                                                                                                                                                                                                                                                                                                                                                                                                                                                                                                                                                                                                                                                                                                                                                                                                                                                                                                                          |                    |
|------------------------------------------------------|----------------------------------------------------------------------------------------------------------------------------------------------------------------------------------------------------------------------------------------------------------------------------------------------------------------------------------------------------------------------------------------------------------------------------------------------------------------------------------------------------------------------------------------------------------------------------------------------------------------------------------------------------------------------------------------------------------------------------------------------------------------------------------------------------------------------------------------------------------------------------------------------------------------------------------------------------------------------------------------------------------------------------------------------------------------------------------------------------------------------------------------------------------------------------------------------------------------------------------------------------------------------------------------------------------------------------------------------------------------------------------------------------------------------------------------------------------------------------------------------------------------------------------------------------------|--------------------|
| <b>Manuscript Number:</b>                            | GIGA-D-17-00277R1                                                                                                                                                                                                                                                                                                                                                                                                                                                                                                                                                                                                                                                                                                                                                                                                                                                                                                                                                                                                                                                                                                                                                                                                                                                                                                                                                                                                                                                                                                                                        |                    |
| <b>Full Title:</b>                                   | The first whole transcriptomic exploration of pre-oviposited early chicken embryos using single and bulked embryonic RNA-sequencing                                                                                                                                                                                                                                                                                                                                                                                                                                                                                                                                                                                                                                                                                                                                                                                                                                                                                                                                                                                                                                                                                                                                                                                                                                                                                                                                                                                                                      |                    |
| <b>Article Type:</b>                                 | Data Note                                                                                                                                                                                                                                                                                                                                                                                                                                                                                                                                                                                                                                                                                                                                                                                                                                                                                                                                                                                                                                                                                                                                                                                                                                                                                                                                                                                                                                                                                                                                                |                    |
| <b>Funding Information:</b>                          | National Research Foundation of Korea (2015R1A3A2033826)                                                                                                                                                                                                                                                                                                                                                                                                                                                                                                                                                                                                                                                                                                                                                                                                                                                                                                                                                                                                                                                                                                                                                                                                                                                                                                                                                                                                                                                                                                 | Prof. Jae Yong Han |
| <b>Abstract:</b>                                     | <p><b>Background</b><br/>The chicken is a valuable model organism, especially in evolutionary and embryology research because its embryonic development occurs in the egg. However, despite its scientific importance, no transcriptome data have been generated for deciphering the early developmental stages of the chicken because of practical and technical constraints accessing pre-oviposited embryos.</p> <p><b>Findings</b><br/>Here, we determine the entire transcriptome of pre-oviposited avian embryos, including oocyte, zygote, and intrauterine embryos from Eyal-giladi and Kochav stage I (EGK.I) to EGK.X collected using a non-invasive approach for the first time. We also compare RNA-sequencing data obtained using bulked embryo sequencing and single embryo/cell sequencing technique. The raw sequencing data were pre-processed with two different genome builds, Galgal4 and Galgal5, and the expression of 17,108 and 26,102 genes was quantified in the respective builds. There were some differences between the two techniques, as well as between the two genome builds, and these were affected by the emergence of long intergenic non-coding RNA annotations.</p> <p><b>Conclusion</b><br/>The first transcriptome datasets of pre-oviposited early chicken embryos based on bulked and single embryo sequencing techniques will serve as a valuable resource for investigating early avian embryogenesis, for comparative studies among vertebrates, and for novel gene annotation in the chicken genome.</p> |                    |
| <b>Corresponding Author:</b>                         | Jae Yong Han, Ph.D.<br>Seoul National University<br>Gwanak-gu, Seoul KOREA, REPUBLIC OF                                                                                                                                                                                                                                                                                                                                                                                                                                                                                                                                                                                                                                                                                                                                                                                                                                                                                                                                                                                                                                                                                                                                                                                                                                                                                                                                                                                                                                                                  |                    |
| <b>Corresponding Author Secondary Information:</b>   |                                                                                                                                                                                                                                                                                                                                                                                                                                                                                                                                                                                                                                                                                                                                                                                                                                                                                                                                                                                                                                                                                                                                                                                                                                                                                                                                                                                                                                                                                                                                                          |                    |
| <b>Corresponding Author's Institution:</b>           | Seoul National University                                                                                                                                                                                                                                                                                                                                                                                                                                                                                                                                                                                                                                                                                                                                                                                                                                                                                                                                                                                                                                                                                                                                                                                                                                                                                                                                                                                                                                                                                                                                |                    |
| <b>Corresponding Author's Secondary Institution:</b> |                                                                                                                                                                                                                                                                                                                                                                                                                                                                                                                                                                                                                                                                                                                                                                                                                                                                                                                                                                                                                                                                                                                                                                                                                                                                                                                                                                                                                                                                                                                                                          |                    |
| <b>First Author:</b>                                 | Young Sun Hwang                                                                                                                                                                                                                                                                                                                                                                                                                                                                                                                                                                                                                                                                                                                                                                                                                                                                                                                                                                                                                                                                                                                                                                                                                                                                                                                                                                                                                                                                                                                                          |                    |
| <b>First Author Secondary Information:</b>           |                                                                                                                                                                                                                                                                                                                                                                                                                                                                                                                                                                                                                                                                                                                                                                                                                                                                                                                                                                                                                                                                                                                                                                                                                                                                                                                                                                                                                                                                                                                                                          |                    |
| <b>Order of Authors:</b>                             | Young Sun Hwang<br>Minseok Seo<br>Hee Jung Choi<br>Sang Kyung Kim<br>Heebal Kim<br>Jae Yong Han, Ph.D.                                                                                                                                                                                                                                                                                                                                                                                                                                                                                                                                                                                                                                                                                                                                                                                                                                                                                                                                                                                                                                                                                                                                                                                                                                                                                                                                                                                                                                                   |                    |
| <b>Order of Authors Secondary Information:</b>       |                                                                                                                                                                                                                                                                                                                                                                                                                                                                                                                                                                                                                                                                                                                                                                                                                                                                                                                                                                                                                                                                                                                                                                                                                                                                                                                                                                                                                                                                                                                                                          |                    |
| <b>Response to Reviewers:</b>                        | Dear Editor,                                                                                                                                                                                                                                                                                                                                                                                                                                                                                                                                                                                                                                                                                                                                                                                                                                                                                                                                                                                                                                                                                                                                                                                                                                                                                                                                                                                                                                                                                                                                             |                    |

Herewith we are submitting our revised manuscript entitled "The first whole transcriptomic exploration of pre-oviposited early chicken embryos using single and bulked embryonic RNA-sequencing" (Manuscript ID: GIGA-D-17-00277).

We would like to express our sincere gratitude to the editor and reviewers who handled this manuscript. We also appreciate the positive and thoughtful comments of the both reviewers who have acknowledged the value of the data submitted. We believe that their comments have greatly improved the reproducibility and readability of our work, especially about the quality control and methodologies of our data. This manuscript was substantially revised according to all of the reviewers' comments. We also prepared a point-by-point response to the reviewer's comments and submitting herewith.

We are looking forward to meet editorial and reviewer suggestion regarding this revised manuscript.

Sincerely yours,

Jae Yong Han, Ph.D.

-----  
The authors are very grateful for the response on the originally submitted manuscript. In accordance to the comments by the reviewers, we have provided point-to-point responses to all of your comments. We believe that this revision and our responses will satisfy your point of view on our manuscript.

<Response to reviewer 1 comments>

The authors present a new dataset they generated with first analytical steps. Emphasizing that chicken embryos are a very useful model to study because, in part of the accessibility of the embryo in the egg and thus to key steps of the development. However studies so far are focusing their efforts on the accessible stages of the development, i.e. those occurring in the egg and we are missing information on the development stages happening before oviposition. The authors produced RNA seq data of those pre-oviposition stages thus giving access to the first expression map of chicken embryos at those early stages in development. Aware of technical biases, the authors sequenced the data from 2 different sources, single embryo vs bulked embryos. This gives an interesting overview of potential differences and strength of both approaches in the context of sequencing those very early stages. Also aware that researchers in the chicken community are still using Galgal4 reference build for comparison purposes, the authors aligned their sequenced data on the 2 most recent builds Galgal4 and Galgal5. This allows to appreciate intrinsic differences between both builds.

This dataset is of interest for any researcher in embryology, in chicken or not, that would like to access expression data of early stages of development. The authors made a good job at controlling the quality their data for the most part. I would definitely recommend to publish this work provided some minor additions/modifications.

1. L55: precise this first set is bulked

Response: We are thankful of the comments for improving our manuscript by the reviewer. As the reviewer's suggestion, we added "bulked" in that sentence (Line 54).

2. L79: stages could be put in chronological order

Response: As the reviewer pointed out, we re-ordered to "the oocyte, the zygote, EGK.I, EGK.III, EGK.VI, EGK.VIII and EGK.X" (Line 78-79).

3. L81: to what extent this technique could have an impact on the embryo integrity, and consequently RNA quality? More generally, for the bulked sequences, how many hens were used? What genetic background are they? Could the authors justify the choice of choosing different animals for the bulk sequencing and the same ones for different stages for the single embryo sequencing?

Response: The embryo integrity and RNA quality are not affected by the abdominal massage technique for harvesting early embryos in chicken. Using these embryos, we can perform the downstream experiments such as in situ hybridization, qRT-PCR, and

RNA sequencing. Also, we used total 137 hens for bulked embryonic sequencing after egg-laying time checked.

On the other hands, White leghorn flock we used is registered in Domestic Animal Diversity Information System (DAD-IS; <http://www.fao.org/dad-is/>) as “White Leghorn SNU” and they have been systematized since they were brought from National Institute of Animal Science in 1992. Thus, the chickens for bulked embryo and single embryo are considered to be the closed population with a genetically similar background. Nevertheless, the expression profiles were shown to be different between bulked and single oocyte and zygote based on Galgal5. This seems to be caused by individual variation and maternal effects in terms of gene expressions during very early stages such as oocyte and zygote, but not in EGK.X. In addition, we changed the words, “genetic information” and “genetic backgrounds” into “the individual gene expression diversity” (Line 170, 172), “its own gene expression” (Line 174), and “various individuals” (Line 176) for not making the readers confused the variation of gene expression with the variation of genetic background.

4. L90: what is the rationale behind the number of embryos pooled together at each stage? Why did the authors chose a higher number for the latest stage?

Response: We thank the reviewer for pointing out this important issue. When we did sampling oocyte, zygote, and intrauterine stages, firstly we checked the stage of embryo morphologically. Immediately after identifying the stage of the embryos, we pooled at least three embryos per one replicate in each stage. In this procedure, it is difficult to use the exact number of samples in all stages, owing to the limited acquisition of intrauterine embryos. In the case of EGK.X which is at oviposition, we could easily obtain a relatively larger number of embryos as one replication.

5. L123: It would be extremely interesting to have on idea of the RNA quality. What is the RIN for each sequenced sample? This information might be useful to interpret some of the further results.

Response: As the reviewer’s question, we prepared rRNA ratio during pre-ovipositional development and RIN of all samples in revised Table S1: Additional file 1. RIN number below 7 were observed from zygote to EGK.VIII stage in few samples although same RNA isolation procedure was applied in oocyte and EGK.X. This is because of common phenomenon that rRNA ratio (28s: 18s) is lower than 1.8 from zygote to EGK.VIII stages, not caused by RNA quality. The low levels of 28s rRNA prior to maternal-to-zygotic transition (MZT) were generally found during early embryonic development. In chicken, the relative amount of 28s rRNA was reduced markedly after the zygote and recovered gradually after EGK.VIII at MZT occurring (Hwang et al., FASEB J 2017), like as bovine until morula stage (Gilbert et al., Mol Reprod Dev 2009). We also added the related sentences to the revised manuscript (Line 100-103 and Line 123-124).

6. L129: replace with 150bp paired-end reads

Response: According to reviewer’s suggestion, we replaced it (Line 134-135).

7. L135: What are the criteria used for filtering after FastQC? We would need some more information to help explain the differences in quality between single embryo and bulked.

Response: Thanks for good suggestion. Here, after Trimmomatic, minimum read length > 75 bp and Phred score > 30 were checked using FastQC (Line 142-144). In addition, we have uploaded all FastQC results in GigaDB including figures and data derived from FastQC.

Location of directory in the GigaDB:

(1) /0.FastQC/1.Bulked\_embryo\_fastqc.zip: FastQC results for fastq files from bulked RNA-seq data

(2) /0.FastQC/2.Single\_Embryo\_fastqc.zip: FastQC results for fastq files from single embryonic RNA-seq data

8. L161: This statement depends on what is the genetic diversity of hens used in the study and how close the hens are from the reference genome. The authors could give other clues to explain those differences. What is the duplication rate? What is the proportion of reads that are uniquely mapped?

Response: Thank you very much for providing us with a clue to our hypothesis. In

revised Table 1, deduplicated percentage derived from FastQC and uniquely mapped reads derived from HISAT2 log were added based on the reviewer's comment. First, we observed significant differences between bulk and single RNA-seq data in terms of duplication rate. In the bulked samples, 31.3% and 42.96% were observed for read 1 and read 2, respectively (In case of, single embryonic sample, 44.78% and 49.33% were observed for read 1 and read 2, respectively). In other words, this result showed a higher read duplication rate in RNA-seq performed with a single embryo sample, demonstrating that there is lower expressional diversity in single embryonic samples. This result has been added to the result body in revised manuscript (Line 170-173).

9. L166: rephrase this sentence

Response: We have rephrased it and corrected the error (0.028 and 0.001 to 2.79 and 0.14) in this sentence (Line 176-180).

10. L190: replace "which RNAs" with "which RNA category" or "which RNA type"

Response: According to reviewer's suggestion, we replaced it (Line 203).

11. L194: what is the threshold of expression used to call a gene expressed?

Response: Here, we just used mapped reads on the reference genome across all samples. Based on the read count of each genes, we designated them as expressed genes (Line 208).

12. L205: this might be linked to the quality of those samples. Is it harder to extract quality RNA from very early stages?

Response: As shown in revised Table S1: Additional file 1, the extracted RNA from these embryos have good quality. Thus, RNA quality does not seem to be related to the different correlation between Galgal4 and Galgal5.

13. L242: The author might want to moderate this sentence. Here bulked embryos were from different genetic background and extracted with a very specific technic. We would like to know to what extend those choices can impact the quality of the data as well. It might not be solely due to the pooling process.

Response: As the above answers, the sample quality does not seem to be relevant to these effects. In terms of the evidences we have found, the pooling effect from the individual gene expression diversity and the difference of gene annotations could impact on such results between oocyte and zygote (Line 257-258).

14. Table1: "surviving": would suggest to rephrase

Response: We have corrected "Surviving reads" to "QC passed reads" and "Surviving rates" to "QC passing rate" in revised Table 1.

15. Figure 2b is it a pairwise comparison? What difference are you testing here?

Response: Here, the null hypothesis assumes that the RNA concentration values of all developmental stages are the same, and the alternative hypothesis hypothesized that RNA concentration values differ in at least one stage. In other words, F-test was performed on a statistical model of one-way Analysis of variance (ANOVA) format. Consequently, The RNA concentration, amount of RNA, and total RNA per embryo did not differ significantly among the groups (Line 398-400).

16. Figure3a-b: what is the correspondence between those lists and the annotation? What is the percentage of overlap? In other words, how many of those genes that are expressed differentially between galgal4 et galgal5 are actually the ones that are not annotated in one of the builds?

Response: Thank you for suggesting the issues from different references. It is quite difficult to the answer to the reviewer's comment. First, we can't perform analysis identifying differentially expressed genes (DE analysis) between Galgal4 and Galgal5 with the genes in a particular build. Please understand that in order to perform DE analysis between both builds, we can only perform on approximately 11,000 genes that were commonly annotated in both builds. Second, if we perform DE analysis on genes that were commonly annotated in both builds, there is a statistical issue. Currently, RNA-seq statistical analysis is performed on a generalized linear model (GLM). Hypothesis testing for differences between two builds violates the independence assumption in this model. To resolve this issue, generalized linear mixed-effect model (GLMM) should be employed, but this model has not yet been proven as standard



method. This question is very interesting, but adding it to a discussion in the main text does not seem to fit the article type of the Data Note, so it only answers the letter.

17. Figure 3c is redundant with Table 2. Y axis: anntoated —> annotated

Response: First, typo that the reviewer pointed out has been fixed in Fig. 3c. But, Figure 3c and Table 2 are different. In case of revised Table 2, the contents include only annotation comparison between Galgal4 and Galgal5. On the other hand, Figure 3c demonstrates that how many newly annotated genes were actually expressed in terms of mapped reads across all samples. In order to improve the readability for the potential readers, Table 2 and Fig. 3c citation of the main text were modified in Line 204-206.

18. Figure 4: would be interesting to correlate those coordinates with known covariates to show what are in the main axis of variation.

Response: Thanks for reviewer pointing out an important issue. As part of the reviewer, we proceeded with factor analysis through various environmental variables (Batch effects and etc.) with vectors obtained through dimensional reduction. As a result, the variation of the projected vector values of dimension 1 and dimension 2, as mentioned in the text, describes the sub-cluster structure of developmental stages best. First dimension showed that developmental stages progressed in a negative direction during intrauterine development. In case of second dimension, variation of values seem to explain the difference between oocyte and fertilized embryos from zygote to EGK.X (Line 417-420).

<Response to reviewer 2 comments>

Hwang and coauthors report their RNA sequencing data of pre-oviposited early chicken embryos. The authors used single cell as well as standard whole tissue RNA-seq analysis and also assess differences between gene annotation in the two most recent chicken genome builds. Given the wide usage of the chicken embryo as a model system to study vertebrate development, this contribution is very important to the research community. I have several issues for the authors to consider revising.

1. Quality of total RNA was assessed using several methods including an Agilent Bioanalyzer (lines 97- 100). The RNA integrity number (RIN) should be reported for all samples. Typically, RNA samples with a  $RIN \leq 7$  are not suitable for accurate RNA-seq analysis.

Response: We are thankful to the considerate comments by the reviewer. As the reviewer's suggestion, we prepared rRNA ratio during pre-ovipositional development and RIN of all samples in revised Table S1: Additional file 1. RIN number below 7 were observed from zygote to EGK.VIII stage in few samples although same RNA isolation procedure in oocyte and EGK.X. This is because of common phenomenon that rRNA ratio (28s: 18s) is lower than 1.8 from zygote to EGK.VIII stages, not caused by RNA quality. The low levels of 28s rRNA prior to maternal-to-zygotic transition (MZT) were generally found during early embryonic development. In chicken, the relative amount of 28s rRNA was reduced markedly after the zygote and recovered gradually after EGK.VIII at MZT occurring (Hwang et al., FASEB J 2017), like as bovine until morula stage (Gilbert et al., Mol Reprod Dev 2009). We also added the related sentences (Line 100-103 and Line 123-124).

2. The methodology for Illumina sequencing library preparation is insufficiently reported (lines 125- 129). More detail should be added here including the method of transcript enrichment and average size of library fragments.

Response: As the reviewer's suggestion, we added detailed methods including specific library prep kit product used in this study and the average size of cDNA libraries (Line 131-133)

3. Table 1 demonstrates the number of reads that passed Trimmomatic filtering, however, representative FastQC plots such as per bas and/or per sequence quality plots should be shown in the main text or supplement to demonstrating the quality of the data.

Response: Thanks for good suggestion. Based on suggestion from reviewers, we have uploaded all FastQC results in GigaDB including figures and data derived from FastQC.

|                                                                                                                                                                                                                                                                           |                                                                                                                                                                                                                                                                                                                                                                                                                                                                                                                                                                                                                                                                                                                                                                                                                                                                                                                                                                                                                                                                                                                                                                                                                                                                                                                                                                                                                                                                                                                                                                                                                                                                                                                                                                                                                                                                                                                                                                                                                                                                                                                                                                                                                                                                                                                                                                                                                                                                                                                                                                                                                                                                                                                                                                                                                                                                                                                                                                                                                                         |
|---------------------------------------------------------------------------------------------------------------------------------------------------------------------------------------------------------------------------------------------------------------------------|-----------------------------------------------------------------------------------------------------------------------------------------------------------------------------------------------------------------------------------------------------------------------------------------------------------------------------------------------------------------------------------------------------------------------------------------------------------------------------------------------------------------------------------------------------------------------------------------------------------------------------------------------------------------------------------------------------------------------------------------------------------------------------------------------------------------------------------------------------------------------------------------------------------------------------------------------------------------------------------------------------------------------------------------------------------------------------------------------------------------------------------------------------------------------------------------------------------------------------------------------------------------------------------------------------------------------------------------------------------------------------------------------------------------------------------------------------------------------------------------------------------------------------------------------------------------------------------------------------------------------------------------------------------------------------------------------------------------------------------------------------------------------------------------------------------------------------------------------------------------------------------------------------------------------------------------------------------------------------------------------------------------------------------------------------------------------------------------------------------------------------------------------------------------------------------------------------------------------------------------------------------------------------------------------------------------------------------------------------------------------------------------------------------------------------------------------------------------------------------------------------------------------------------------------------------------------------------------------------------------------------------------------------------------------------------------------------------------------------------------------------------------------------------------------------------------------------------------------------------------------------------------------------------------------------------------------------------------------------------------------------------------------------------------|
|                                                                                                                                                                                                                                                                           | <p>Location of directory in the GigaDB:<br/> (1) /0.FastQC/1.Bulked_embryo_fastqc.zip: FastQC results for fastq files from bulked RNA-seq data<br/> (2) /0.FastQC/2.Single_Embryo_fastqc.zip: FastQC results for fastq files from single embryonic RNA-seq data</p> <p>4. All settings for Trimmomatic filtering software (line 135) HISAT2 alignment software (line 155), and HTSeq-count transcript quantification software (line 171) should be reported.<br/> Response: Thanks for reviewer’s suggestion to improve the reproducibility of our paper. Based on the reviewer’s comment, we add specific option of used tools as follows:</p> <p>(1) Trimmomatic ver. 0.33 with “-phred33 and ILLUMINACLIP:/home/Program/Trimmomatic-0.32/adapters/TruSeq3-PE-2.fa:2:30:10 MINLEN:75 option” (Line 141-142).</p> <p>(2) HISAT2 ver. 2.0.0 [15] was used with the “--rna-strandness RF -x [File name of Galgal4 or Galgal5 reference] -1 [File name of left lead] -2 [File name of right read] 2&gt; [Sample name].log” (Line 163-165).</p> <p>(3) HTSeq-count [17] with following option, “python -m HTSeq.scripts.count -f bam --stranded=reverse [File name of bam file] [File name of annotation (.GTF file)] &gt; [Output file name]” (Line 183-185).</p> <p>5. Figure 3 alludes to interesting differences in gene annotation between Galgal4 and Galgal5 genome builds but does not report what these newly annotated transcripts are in the updated annotation. A table of genes/transcripts represented in Fig3a-c should be included.<br/> Response: In this study, we just used Galgal4 and Galgal5 reference genome and gene annotations rather than do-novo based assembly. Thus, those annotations have been already provided in Ensembl DB; (Galgal4, jul2016.archive.ensembl.org/Gallus_gallus/Info/Annotation and Galgal5, www.ensembl.org/Gallus_gallus/Info/Annotation).<br/> The major difference between two gene builds is shown to be the presence of long non-coding genes and the increased number of gene transcripts.</p> <p>6. Figure 4 alludes to interesting differences in gene expression between developmental stages but there are no reports on what these genes are in the main body of the paper. An additional figure or table should be added to report several aspects of differential gene expression between embryo stages.<br/> Response: Since this article type is a Data Note and according to the Criteria of Data Note in GigaScience, we have focused on the results obtained from the pre-processing step as much as possible. As shown in Figure 4, the expression pattern of these genes will vary according to the developmental stages, we expect potential users to unveil their-own downstream analyses based on the raw-count and TMM normalized matrix we provided. Moreover, because of the possibility of duplication of processed data regarding differential gene expression in our further research article, please excuse that we could not provide it completely.</p> |
| <b>Additional Information:</b>                                                                                                                                                                                                                                            |                                                                                                                                                                                                                                                                                                                                                                                                                                                                                                                                                                                                                                                                                                                                                                                                                                                                                                                                                                                                                                                                                                                                                                                                                                                                                                                                                                                                                                                                                                                                                                                                                                                                                                                                                                                                                                                                                                                                                                                                                                                                                                                                                                                                                                                                                                                                                                                                                                                                                                                                                                                                                                                                                                                                                                                                                                                                                                                                                                                                                                         |
| <b>Question</b>                                                                                                                                                                                                                                                           | <b>Response</b>                                                                                                                                                                                                                                                                                                                                                                                                                                                                                                                                                                                                                                                                                                                                                                                                                                                                                                                                                                                                                                                                                                                                                                                                                                                                                                                                                                                                                                                                                                                                                                                                                                                                                                                                                                                                                                                                                                                                                                                                                                                                                                                                                                                                                                                                                                                                                                                                                                                                                                                                                                                                                                                                                                                                                                                                                                                                                                                                                                                                                         |
| Are you submitting this manuscript to a special series or article collection?                                                                                                                                                                                             | No                                                                                                                                                                                                                                                                                                                                                                                                                                                                                                                                                                                                                                                                                                                                                                                                                                                                                                                                                                                                                                                                                                                                                                                                                                                                                                                                                                                                                                                                                                                                                                                                                                                                                                                                                                                                                                                                                                                                                                                                                                                                                                                                                                                                                                                                                                                                                                                                                                                                                                                                                                                                                                                                                                                                                                                                                                                                                                                                                                                                                                      |
| <b>Experimental design and statistics</b>                                                                                                                                                                                                                                 | Yes                                                                                                                                                                                                                                                                                                                                                                                                                                                                                                                                                                                                                                                                                                                                                                                                                                                                                                                                                                                                                                                                                                                                                                                                                                                                                                                                                                                                                                                                                                                                                                                                                                                                                                                                                                                                                                                                                                                                                                                                                                                                                                                                                                                                                                                                                                                                                                                                                                                                                                                                                                                                                                                                                                                                                                                                                                                                                                                                                                                                                                     |
| Full details of the experimental design and statistical methods used should be given in the Methods section, as detailed in our <a href="#">Minimum Standards Reporting Checklist</a> . Information essential to interpreting the data presented should be made available |                                                                                                                                                                                                                                                                                                                                                                                                                                                                                                                                                                                                                                                                                                                                                                                                                                                                                                                                                                                                                                                                                                                                                                                                                                                                                                                                                                                                                                                                                                                                                                                                                                                                                                                                                                                                                                                                                                                                                                                                                                                                                                                                                                                                                                                                                                                                                                                                                                                                                                                                                                                                                                                                                                                                                                                                                                                                                                                                                                                                                                         |

|                                                                                                                                                                                                                                                                                                                                                                                                                                                                                                                                                         |            |
|---------------------------------------------------------------------------------------------------------------------------------------------------------------------------------------------------------------------------------------------------------------------------------------------------------------------------------------------------------------------------------------------------------------------------------------------------------------------------------------------------------------------------------------------------------|------------|
| <p>in the figure legends.</p> <p>Have you included all the information requested in your manuscript?</p>                                                                                                                                                                                                                                                                                                                                                                                                                                                |            |
| <p><b>Resources</b></p> <p>A description of all resources used, including antibodies, cell lines, animals and software tools, with enough information to allow them to be uniquely identified, should be included in the Methods section. Authors are strongly encouraged to cite <a href="#">Research Resource Identifiers</a> (RRIDs) for antibodies, model organisms and tools, where possible.</p> <p>Have you included the information requested as detailed in our <a href="#">Minimum Standards Reporting Checklist</a>?</p>                     | <p>Yes</p> |
| <p><b>Availability of data and materials</b></p> <p>All datasets and code on which the conclusions of the paper rely must be either included in your submission or deposited in <a href="#">publicly available repositories</a> (where available and ethically appropriate), referencing such data using a unique identifier in the references and in the “Availability of Data and Materials” section of your manuscript.</p> <p>Have you have met the above requirement as detailed in our <a href="#">Minimum Standards Reporting Checklist</a>?</p> | <p>Yes</p> |

1 **1 The first whole transcriptomic exploration of pre-oviposited early chicken**  
2  
3 **2 embryos using single and bulked embryonic RNA-sequencing**  
4  
5  
6  
7

8 4 Young Sun Hwang<sup>1,†</sup>, Minseok Seo<sup>2,3,†</sup>, Hee Jung Choi<sup>1</sup>, Sang Kyung Kim<sup>1</sup>, Heebal Kim<sup>1,2,4</sup>,  
9  
10 5 and Jae Yong Han<sup>1,4,\*</sup>  
11

12 6 †These authors contributed equally to this work  
13  
14  
15  
16

17 8 \*Corresponding Author  
18

19 9 Jae Yong Han, Ph.D.  
20

21 10 Seoul National University, 1 Gwanak-ro, Gwanak-gu, Seoul 08826, Korea  
22

23 11 Phone: +82-2-880-4810  
24

25 12 FAX: +82-2-874-4811  
26

27 13 E-mail: jaehan@snu.ac.kr  
28  
29  
30  
31  
32  
33  
34  
35  
36  
37  
38  
39  
40  
41  
42  
43  
44  
45  
46  
47  
48  
49  
50  
51  
52  
53  
54  
55  
56  
57  
58  
59  
60  
61  
62  
63  
64  
65

1 15 **Abstract**

2  
3 16 **Background**

4  
5 17 The chicken is a valuable model organism, especially in evolutionary and embryology  
6  
7 18 research because its embryonic development occurs in the egg. However, despite its  
8  
9 19 scientific importance, no transcriptome data have been generated for deciphering the early  
10  
11 20 developmental stages of the chicken because of practical and technical constraints  
12  
13 21 accessing pre-oviposited embryos.

14  
15  
16 22 **Findings**

17  
18 23 Here, we determine the entire transcriptome of pre-oviposited avian embryos, including  
19  
20 24 oocyte, zygote, and intrauterine embryos from Eyal-giladi and Kochav stage I (EGK.I) to  
21  
22 25 EGK.X collected using a non-invasive approach for the first time. We also compare RNA-  
23  
24 26 sequencing data obtained using bulked embryo sequencing and single embryo/cell  
25  
26 27 sequencing technique. The raw sequencing data were pre-processed with two different  
27  
28 28 genome builds, Galgal4 and Galgal5, and the expression of 17,108 and 26,102 genes was  
29  
30 29 quantified in the respective builds. There were some differences between the two techniques,  
31  
32 30 as well as between the two genome builds, and these were affected by the emergence of  
33  
34 31 long intergenic non-coding RNA annotations.

35  
36  
37 32 **Conclusion**

38  
39 33 The first transcriptome datasets of pre-oviposited early chicken embryos based on bulked  
40  
41 34 and single embryo sequencing techniques will serve as a valuable resource for investigating  
42  
43 35 early avian embryogenesis, for comparative studies among vertebrates, and for novel gene  
44  
45 36 annotation in the chicken genome.

46  
47  
48 37 **Keywords**

49  
50 38 RNA-seq - Single embryonic sequencing - Single cell sequencing - Early embryo - Chicken  
51  
52  
53  
54  
55  
56  
57  
58  
59  
60  
61  
62  
63  
64  
65

## 39 **Background**

40 Avian species are valuable animal models in many research areas, especially in embryology,  
41 because the avian embryo develops in an egg before hatching. This is an excellent *in vitro*-  
42 like *in vivo* system that has allowed extensive research of the developmental events during  
43 embryogenesis. Previous studies have examined primitive streak formation and gastrulation  
44 after oviposition in avian species [1-4]. Nevertheless, despite the importance of the initial  
45 events in avian embryogenesis before oviposition, only a few morphological studies have  
46 examined pre-oviposited embryos because of practical difficulties accessing the embryos [5-  
47 7]. The temporal regulation of gene expression during the pre-oviposited stages is important  
48 for understanding early embryonic development.

49         Recently, the Bird10K project was initiated because of the intermediate position of  
50 birds in the comparative biology of vertebrates and their broad utility for diverse research.  
51 This project used the genome sequences of 48 species of birds to construct a phylogenetic  
52 hierarchy of avian species and examine the comparative genomics of flight and functional  
53 adaptations [8-10]. However, no transcriptomic approach to early bird embryos has been  
54 performed. Here, we present whole transcriptome sequencing of bulked pre-oviposited  
55 chicken embryos, including oocyte, zygote, and intrauterine embryos from Eyal-giladi and  
56 Kochav stage I (EGK.I) to EGK.X (Fig. 1a). Furthermore, a single oocyte, zygote, and EGK.X  
57 blastoderm from one hen were sequenced (Fig. 1b) and compared with the results for bulked  
58 embryos. Based on the whole transcriptome of early chicken embryos, we mapped our  
59 sequencing reads on the two most recent chicken (*Gallus gallus*) genome references,  
60 Galgal4 and Galgal5, and examined the differences in gene expression between the two  
61 builds with or without long intergenic non-coding RNA (lincRNA) annotations.

## 63 **Data description**

### 64 **Collection of bulked early chicken embryos**

65 In the chicken, the initial 25 h of embryonic development from fertilization to oviposition



1 66 progresses through the oviduct. The mature oocyte on top of the yellow yolk is ovulated into  
2  
3 67 the infundibulum 30 min after oviposition. Then, fertilization occurs and the zygote passes  
4  
5 68 through the magnum without any morphological changes in the embryo. According to the  
6  
7 69 well-defined criteria of Eyal-Giladi and Kochav [5, 6], the first cleavage is observed 5 h after  
8  
9 70 fertilization in the shell gland and has been designated EGK.I. Beginning with this event, the  
10  
11 71 pre-ovipositional development of birds is divided into 10 stages, including the cleavage  
12  
13 72 (EGK.I to EGK.VI) and area pellucida formation (EGK.VII to EGK.X) periods. During the  
14  
15 73 cleavage stages, rapid cellularization and an increase in layers lead to formation of a multi-  
16  
17 74 layered blastula by EGK.VI. In the second half of intrauterine development, the first  
18  
19 75 morphological segregation, including the area pellucida and area opaca regions, occurs with  
20  
21 76 anterior–posterior axis formation and layer reduction. Finally, a thinner, longer, bi-layered  
22  
23 77 blastoderm is established at EGK.X. Based on the morphological dynamics that occur during  
24  
25 78 intrauterine development, we chose critical representative stages to analyze: the oocyte, the  
26  
27 79 zygote, EGK.I, EGK.III, EGK.VI, EGK.VIII and EGK.X (Fig. 1a).  
28  
29  
30  
31

32 80 The egg-laying times of white leghorn (WL) hens were recorded, and intrauterine  
33  
34 81 eggs from EGK.I–VIII were harvested using an abdominal massage technique [11]. Briefly,  
35  
36 82 the abdomen was pushed gently until the shell gland was exposed; the surface of the shell  
37  
38 83 gland expands when an egg is present for egg shell formation. After expansion of the shell  
39  
40 84 gland surface, massaging was used to move the egg gently towards the cloaca until the  
41  
42 85 intrauterine egg was released. EGK.X blastoderms were collected from WL hens after  
43  
44 86 oviposition. To collect oocytes and zygotes, WL hens were sacrificed and the follicles were  
45  
46 87 collected. Zygote embryos located in the magnum and showing no cleavage were collected  
47  
48 88 within 1 h post-fertilization according to the recorded egg-laying times. All embryos were  
49  
50 89 classified according to morphological criteria (Fig. 1c). All stages were prepared in triplicate  
51  
52 90 and each replicate contained three to seven embryos, while there were ten embryos per  
53  
54 91 replicate of the post-oviposited EGK.X blastoderm (Fig. 2a). Shortly after collection, the  
55  
56 92 embryos were separated from the egg using sterilized paper, and the shell membrane and  
57  
58  
59  
60  
61  
62  
63  
64  
65

1 93 albumen were detached from the yolk. A piece of square filter paper (Whatman, Maidstone,  
2  
3 94 UK) with a hole in the center was placed over the germinal disc. After cutting around the  
4  
5 95 paper containing the embryo, it was gently turned over and transferred to saline to remove  
6  
7 96 the yolk and vitelline membrane and allow embryo collection. Total RNA was isolated from  
8  
9  
10 97 early embryos using TRIzol reagent (Invitrogen, Carlsbad, CA, USA). The quality and  
11  
12 98 quantity of the extracted total RNA were determined using the Trinean DropSense96 system  
13  
14 99 (Trinean, Gentbrugge, Belgium), a RiboGreen kit (Invitrogen), and an Agilent 2100  
15  
16 100 Bioanalyzer (Agilent Technologies, Santa Clara, CA, USA). We assessed rRNA ratio (28s:  
17  
18 101 18s) and RNA integrity number (RIN) of bulked embryos (Table S1: Additional file 1). We  
19  
20  
21 102 observed lower rRNA ratio from zygote to EGK.VIII stage, because of the low levels of 28s  
22  
23 103 rRNA before maternal-to-zygotic transition (MZT) during early development [12, 13]. The  
24  
25 104 average concentration and amount of total RNA in the early stages was 157.7 ng/ $\mu$ L and  
26  
27 105 7,026.2 ng, respectively, with the exception of EGK.X, which contained 368.9 ng/ $\mu$ L and  
28  
29  
30 106 18,495.8 ng due to the larger number of embryos pooled (Fig. 2b, c). Based on the amount  
31  
32 107 of total RNA and the number of embryos in each sample, we estimated the total amount of  
33  
34 108 RNA per embryo in each stage. On average, the early chicken embryos contained 1,457 ng  
35  
36 109 of total RNA (Fig. 2d).

#### 40 41 111 **Collection of a single oocyte, zygote, and EGK.X blastoderm from one hen**

42  
43 112 In accordance with the estimated amount of total RNA per embryo, a single RNA-rich  
44  
45 113 embryo could be used to perform RNA-sequencing (RNA-Seq) without an amplification  
46  
47 114 technique. In this way, probable sequencing errors due to library amplification from low-input  
48  
49  
50 115 RNA can be avoided. Furthermore, the deviation of transcriptomes among early embryos at  
51  
52 116 the same stage can be examined. Chicken physiology allows a single oocyte, zygote, and  
53  
54 117 EGK.X blastoderm to be collected from one hen at the same time, which minimizes any  
55  
56  
57 118 individual variation and maternal effects (Fig. 1b). On the day when single embryos were  
58  
59 119 acquired, a single EGK.X blastoderm was collected and the time was recorded. Within 1 h

1 120 post-fertilization according to the recorded egg-laying times, a WL hen was sacrificed and a  
2  
3 121 single oocyte and zygote were simultaneously collected. All stages were prepared in  
4  
5 122 triplicate (Fig. 2a). The subsequent steps, including embryo separation and total RNA  
6  
7 123 isolation and quantification, were the same as for the pooled embryos. RIN of single  
8  
9 124 embryos were comparable to bulked embryos (Table S1: Additional file 1). With the single-  
10  
11 125 embryo approach, the RNA concentration was 105.3 ng/ $\mu$ L and the amount of total RNA  
12  
13 126 averaged 2123.5 ng (Fig. 2b, c). The total amount of RNA for a single embryo was higher  
14  
15 127 and more constant among the different stages than with the bulked embryo collection (Fig.  
16  
17 128 2d).

### 23 130 **Library preparation and whole transcriptome sequencing**

25 131 Total RNA was used to construct cDNA libraries using the TruSeq Stranded Total RNA  
26  
27 132 Sample Preparation kit with Ribo-Zero Gold (Illumina, San Diego, CA, USA). The resulting  
28  
29 133 average size of the cDNA libraries was approximately 530 bp. The resulting libraries were  
30  
31 134 subjected to transcriptome analysis using the Illumina NextSeq 500 platform to produce 150  
32  
33 135 bp paired-end reads.

### 39 137 **Summary statistics of pre-processing for RNA-seq data**

41 138 Thirty RNA-seq samples were used in the pre-processing step for the quantification of gene  
42  
43 139 expression in the early developmental stages in the chicken. First, adapter sequences and  
44  
45 140 poor-quality reads were removed from the raw paired-end sequenced files using  
46  
47 141 Trimmomatic ver. 0.33 with “-phred33 and ILLUMINACLIP:/home/Program/Trimmomatic-  
48  
49 142 0.32/adapters/TruSeq3-PE-2.fa:2:30:10 MINLEN:75 option” [14]. The quality of the clean  
50  
51 143 reads, including minimum read length > 75 bp, and Phred score > 30, was verified using  
52  
53 144 FastQC ver. 0.11.2 [15]. On average, 58,930,612 (96.75%) and 39,969,608 (86.16%) paired-  
54  
55 145 end reads remained after the quality-control step for bulked and single-embryo sequencing,  
56  
57 146 respectively (Table 1).

1 147 The clean reads were mapped into the two different builds of the Galgal4 and  
2  
3 148 Galgal5 reference genomes, which were obtained from the Ensembl database. The Galgal4  
4  
5 149 build was the so-called “golden standard” reference chicken genome at the end of 2015, and  
6  
7 150 many studies have employed this build. In December 2016, a new genome build, Galgal5  
8  
9  
10 151 (Ref Seq assembly accession: GCA\_000002315.3) and an improved gene model were  
11  
12 152 established using advanced sequencing techniques. One of the features of Galgal5  
13  
14 153 compared with Galgal4 is the different read length used when the gene model was  
15  
16 154 established. This change improved inaccurate gene annotations, especially the structure of  
17  
18 155 isoforms, in existing short-read based gene models through an isoform sequencing  
19  
20 156 technique using the Pacific Biosciences (PacBio) long reads. Furthermore, PacBio long-read  
21  
22 157 sequencing technology makes it possible to establish lincRNAs, which is important in  
23  
24 158 developmental biology [16]. Given that our data were not only an early developmental  
25  
26 159 sample of a chicken but also a sample of all types of RNAs, this must be considered when  
27  
28 160 quantifying gene expression levels in the RNA-seq pipeline. Therefore, we decided to  
29  
30 161 quantify the expression level of the entire transcriptome using the two different versions of  
31  
32 162 the genome builds, and then compared the results to examine the differences. In the  
33  
34 163 alignment step, HISAT2 ver. 2.0.0 [17] was used with the “--rna-strandness RF -x [File name  
35  
36 164 of Galgal4 or Galgal5 reference] -1 [File name of left lead] -2 [File name of right read] 2>  
37  
38 165 [Sample name].log”. As a result, an average of 76.07 and 73.27% mapping rates were  
39  
40 166 observed in Galgal4 and Galgal5, respectively, in the 21 bulked embryo samples and 84.41  
41  
42 167 and 84.28% were observed in the nine single embryo or cell samples (Table 1). For Galgal4  
43  
44 168 and Galgal5, the average observed difference in the mapping rate between the bulked and  
45  
46 169 single embryo samples was 8.35 and 11%, respectively. We suspected that this difference in  
47  
48 170 mapping rates was caused by the individual gene expression diversity. Upon examining the  
49  
50 171 duplication rate of the generated read, higher duplication rate was observed in single cell  
51  
52 172 and/or embryonic RNA-seq, which is evidence that the individual gene expression diversity  
53  
54 173 is lower in single embryonic samples (Table 1). Since transcriptome data generated using  
55  
56  
57  
58  
59  
60  
61  
62  
63  
64  
65

1 174 single embryo sequencing technology contains only its own gene expression for a single  
2  
3 175 entity, it is assumed that the mapping rate is increased by alleviating the heterogeneity  
4  
5 176 problem derived from various individuals. We also observed small differences in the average  
6  
7 177 mapping rates in two genome builds; 2.79 and 0.14% decrease respectively for the bulked  
8  
9  
10 178 and single embryo samples in Galgal5 compared to Galgal4, which implies that there are  
11  
12 179 little differences between the two genome builds at the DNA level, but more impact on  
13  
14 180 bulked embryos. Following the alignment step using the two different versions of the genome  
15  
16 181 builds, alignment files (.SAM files) were converted into binary alignment files (.BAM) using  
17  
18 182 SAMtools ver. 1.4.1 [18]. Based on the alignment files, the gene expression levels (number  
19  
20 183 of mapped reads) were quantified using HTSeq-count [19] with following option, “python -m  
21  
22 184 HTSeq.scripts.count -f bam --stranded=reverse [File name of bam file] [File name of  
23  
24 185 annotation (.GTF file)] > [Output file name]” with the Ensembl gene annotation files  
25  
26 186 corresponding to the genome builds (Ensembl release 85 for Galgal4 and 86 for Galgal5). As  
27  
28 187 a result, the number of mapped reads was quantified in each pipeline and 17,108 and  
29  
30 188 26,102 genes were annotated in the Galgal4 and Galgal5 genome builds, respectively.  
31  
32  
33  
34  
35

### 36 190 **Comparison of the gene expression patterns between Galgal4 and Galgal5 in chicken** 37 38 39 191 **early embryo samples**

40  
41 192 Based on the mapped-count matrix of the genome builds and the Ensembl annotation, we  
42  
43 193 systematically investigated how many and which types of genes differed between the two  
44  
45 194 genome builds. First, we found that many genes were differentially annotated in each build in  
46  
47 195 terms of their Ensembl IDs (Fig. 3a). Of the 17,108 and 26,102 annotated genes in Galgal4  
48  
49 196 and Galgal5, respectively, only 11,451 Ensembl IDs were shared by both annotations, while  
50  
51 197 5,657 and 14,651 Ensembl IDs were annotated only in the respective builds. Next, we  
52  
53 198 compared the two genome builds based on the genes actually expressed in the early  
54  
55 199 embryo samples of chickens. For this comparison, we filtered out genes with no mapped  
56  
57 200 counts across all 30 RNA-seq samples. As a result, 901 and 3,849 genes were filtered out in  
58  
59  
60  
61  
62  
63  
64  
65

1 201 the raw gene annotations of Galgal4 and Galgal5, respectively (*i.e.*, 16,207 and 22,253  
2  
3 202 genes remained). Because the same pattern of results was observed when validated with  
4  
5 203 the filtered Ensembl IDs (Fig. 3b), we then examined which RNA type produced the  
6  
7 204 difference between Galgal4 and Galgal5. As a result, many lincRNAs and protein-coding  
8  
9 205 genes were newly identified in Galgal5 (Table 2) and confirmed to be expressed in early  
10  
11 206 chicken embryos (Fig. 3c). With the development of sequencing technology, lincRNA has  
12  
13 207 been added to over 5,166 new genes, and it was confirmed that it is actually expressed in  
14  
15 208 our data based on the mapped reads. Unlike lincRNA, which was unilaterally added to  
16  
17 209 Galgal5, there were many changes in protein-coding genes (Table 2). A total of 4,892  
18  
19 210 protein-coding genes were discarded, while 5,613 were added in the new version of the  
20  
21 211 gene annotation (based on the Ensembl ID matching). Since there is still a lack of empirical  
22  
23 212 evidence and practical discussion of the validity of both gene models, it is impossible to  
24  
25 213 determine which genome build is correct for quantifying gene expression in our study.  
26  
27 214 However, we expect to contribute to further studies by providing the entire transcript  
28  
29 215 expression metrics for early embryos of chickens in both builds. Finally, correlations between  
30  
31 216 the 30 samples were examined based on the quantified expression of 11,001 genes  
32  
33 217 common to the gene annotations of these two builds (Fig. 3d). Based on bulked embryo  
34  
35 218 sequencing, high correlations ( $\geq 0.9$ ) were observed between Galgal4 and Galgal5, except  
36  
37 219 for the oocyte and zygote. In comparison, single embryo and/or cell sequencing showed the  
38  
39 220 high correlation between Galgal4 and Galgal5 including the oocyte and zygote. This  
40  
41 221 demonstrates the excellent reproducibility of the data produced based on the single  
42  
43 222 experimental subject. Most of the embryonic transcriptome data generated to date have  
44  
45 223 involved pooling problems and we expect to be able to perform more sophisticated  
46  
47 224 downstream analysis using single embryo and/or cell sequencing, which is now possible due  
48  
49 225 to technological developments.  
50  
51  
52  
53  
54  
55  
56  
57  
58

## 59 227 **Comparison of bulked embryo sequencing and single embryo and/or cell sequencing**

60  
61  
62  
63  
64  
65



1 228 **with chicken early embryos**

2  
3 229 To investigate the differences between the two technologies more systematically,  
4  
5 230 multidimensional scaling analysis was performed using information from 30 RNA-seq  
6  
7 231 samples in two gene expression matrixes: Galgal4 and Galgal5. All of the samples in both  
8  
9 232 gene expression matrixes clearly clustered according to their developmental stage, except  
10  
11 233 for the zygote, EGK.I, and EGK.III (Fig. 4). This means that although there are morphological  
12  
13 234 differences, there is no transcriptome change during the early embryonic development of the  
14  
15 235 chicken for a specific time after zygotic gene activation. In fact, the time from the zygote to  
16  
17 236 EGK.III is also very short. While most of the patterns seem to be concordant between  
18  
19 237 Galgal4 and Galgal5, distinct differences were observed between the bulked and single  
20  
21 238 embryo RNA-seq techniques for the oocyte and zygote samples based on the Galgal5 gene  
22  
23 239 expression matrix. However, no difference was detected between the two techniques for the  
24  
25 240 EGK.X samples, which is presumably due to the difference between the bulked and single  
26  
27 241 cells because we performed single embryo RNA-seq for the oocyte, zygote, and EGK.X  
28  
29 242 stages. The RNA samples from the oocyte and zygote were derived from a single cell,  
30  
31 243 whereas those from EGK.X were derived from bulked cells. As we have already examined  
32  
33 244 the difference in gene annotation between Galgal4 and Galgal5, more than 10,000 genes  
34  
35 245 have been changed, which includes both protein-coding genes and lincRNAs. Of these  
36  
37 246 changes, 5,166 newly added lincRNAs may be a major factor causing this difference  
38  
39 247 because lincRNA plays an important role in the zygote as an epigenetic marker in both  
40  
41 248 humans and mice, which have been subjected to lincRNA annotation and early embryonic  
42  
43 249 transcription studies. Furthermore, epigenetic markers are very sensitive, exhibiting subject-  
44  
45 250 or cell-specific characteristics. Therefore, our RNA-Seq data based on the single embryo  
46  
47 251 and cell technique for oocytes and zygotes is more accurate than ordinary RNA-Seq data  
48  
49 252 because it eliminates epigenetic and genetic pooling effects. For example, bulked zygote  
50  
51 253 samples were separated from the cluster of EGK.I and EGK.III samples in a  
52  
53 254 multidimensional scaling (MDS) analysis based on the Galgal5 gene matrix, whereas there  
54  
55  
56  
57  
58  
59  
60  
61  
62  
63  
64  
65

1 255 was no difference in the Galga4 gene expression matrix (Fig. 4, right panel). This shows that  
2  
3 256 quantifying gene expression using the standard RNA-Seq pooled embryo sequencing  
4  
5 257 technique could be affected by the individual gene expression diversity and the difference of  
6  
7  
8 258 gene annotations.

9  
10 259 In summary, we produced the first whole transcriptome sequences of pre-oviposited  
11  
12 260 early chicken embryos based on standard RNA-Seq and single embryo sequencing  
13  
14 261 techniques. We then quantified and compared gene expression using the standard gene  
15  
16 262 annotation used for the chicken and a new chicken gene annotation based on the advanced  
17  
18  
19 263 long-read sequencing technique. As a result, we not only demonstrated the accuracy of  
20  
21 264 RNA-Seq data based on single embryo or cell sequencing but also successfully quantified  
22  
23 265 5,166 lincRNAs in the new chicken gene model, for the pre-oviposited early chicken embryo.  
24  
25 266 We expect that the transcriptome sequences of pre-oviposited early chicken embryos will fill  
26  
27  
28 267 the gap in comparative developmental and evolutionary studies of vertebrates as a valuable  
29  
30 268 resources and provide comprehensive knowledge of early avian embryogenesis.  
31  
32 269 Furthermore, the oocyte and early chicken embryos express numerous types of RNA,  
33  
34 270 including mRNA and lincRNA, so our dataset should help to establish novel transcript and  
35  
36  
37 271 gene annotations for the chicken reference genome. Our large dataset should also be useful  
38  
39 272 for future studies of avian and comparative genomics because the data were generated  
40  
41 273 using the latest sequencing platform and whole transcriptome sequencing enabling the  
42  
43 274 characterization of all RNA transcripts, including primary transcripts, regardless of  
44  
45  
46 275 polyadenylation.

#### 47 48 276 49 50 277 **Availability of supporting data**

51  
52 278 The bulked and single embryo RNA-Seq data have been deposited in the NCBI GEO  
53  
54 279 database (GSE86592 and GSE100798, respectively). Supporting data including pre-  
55  
56  
57 280 processed gene expression levels are also available in the GigaScience database, GigaDB  
58  
59 281 [20].  
60  
61  
62  
63  
64  
65

1 282  
2  
3 283  
4  
5 284  
6  
7  
8 285  
9  
10 286  
11  
12 287  
13  
14 288  
15  
16 289  
17  
18  
19 290  
20  
21 291  
22  
23 292  
24  
25 293  
26  
27  
28 294  
29  
30 295  
31  
32 296  
33  
34 297  
35  
36 298  
37  
38  
39 299  
40  
41 300  
42  
43 301  
44  
45 302  
46  
47  
48 303  
49  
50 304  
51  
52 305  
53  
54 306  
55  
56  
57 307  
58  
59 308  
60  
61  
62  
63  
64  
65

**Abbreviations**

EGK: Eyal-giladi and Kochav; lincRNA: long intergenic non-coding RNA; MDS: multidimensional scaling; PacBio: Pacific Biosciences; RNA-Seq: RNA-sequencing; WL: white leghorn.

**Experimental animals and animal care**

The care and experimental use of chickens were approved by the Institute of Laboratory Animal Resources, Seoul National University (SNU-150827-1). Chickens were maintained according to a standard management program at the University Animal Farm, Seoul National University, Korea. The procedures for animal management, reproduction and embryo manipulation adhered to the standard operating protocols of our laboratory.

**Competing interests**

The authors declare that they have no competing interests.

**Funding**

This work was supported by the National Research Foundation of Korea (NRF) grant funded by the Korea government (MSIP) (No. NRF-2015R1A3A2033826).

**Authors' contributions**

YSH and JYH conceived and designed the experiments. YSH, HJC, and SKK collected embryos. YSH prepared RNA samples and generated whole-transcriptome RNA-seq reads. YSH, MS, HK, and JYH analyzed and wrote the manuscript. All authors read and edited the manuscript.

**Author details**

1 309 <sup>1</sup>Department of Agricultural Biotechnology and Research Institute of Agriculture and Life  
2  
3 310 Sciences, Seoul National University, Seoul 08826, Korea. <sup>2</sup>CHO&KIM genomics, SNU  
4  
5 311 Research Park, Seoul National University Mt.4-2, Seoul 08826, Korea. <sup>3</sup>Channing Division of  
6  
7 312 Network Medicine, Harvard Medical School and Brigham and Women's Hospital, Boston,  
8  
9  
10 313 Massachusetts, USA. <sup>4</sup>Institute for Biomedical Sciences, Shinshu University, Minamiminowa,  
11  
12 314 Nagano 399-4598, Japan.  
13

## 16 316 **References**

- 19 317 1. Kispert A, Ortner H, Cooke J and Herrmann BG. The chick Brachyury gene:  
20 318 developmental expression pattern and response to axial induction by localized activin.  
21 319 *Dev Biol.* 1995;168 2:406-15. doi:10.1006/dbio.1995.1090.
- 22 320 2. Streit A, Berliner AJ, Papanayotou C, Sirulnik A and Stern CD. Initiation of neural  
23 321 induction by FGF signalling before gastrulation. *Nature.* 2000;406 6791:74-8.  
24 322 doi:10.1038/35017617.
- 25 323 3. Skromne I and Stern CD. Interactions between Wnt and Vg1 signalling pathways  
26 324 initiate primitive streak formation in the chick embryo. *Development.* 2001;128  
27 325 15:2915-27.
- 28 326 4. Torlopp A, Khan MA, Oliveira NM, Lekk I, Soto-Jimenez LM, Sosinsky A, et al. The  
29 327 transcription factor Pitx2 positions the embryonic axis and regulates twinning. *Elife.*  
30 328 2014;3:e03743. doi:10.7554/eLife.03743.
- 31 329 5. Eyal-Giladi H and Kochav S. From cleavage to primitive streak formation: a  
32 330 complementary normal table and a new look at the first stages of the development of  
33 331 the chick. I. General morphology. *Dev Biol.* 1976;49 2:321-37.
- 34 332 6. Kochav S, Ginsburg M and Eyal-Giladi H. From cleavage to primitive streak  
35 333 formation: a complementary normal table and a new look at the first stages of the  
36 334 development of the chick. II. Microscopic anatomy and cell population dynamics. *Dev*  
37 335 *Biol.* 1980;79 2:296-308.
- 38 336 7. Park HJ, Park TS, Kim TM, Kim JN, Shin SS, Lim JM, et al. Establishment of an in  
39 337 vitro culture system for chicken preblastodermal cells. *Mol Reprod Dev.* 2006;73  
40 338 4:452-61. doi:10.1002/mrd.20441.
- 41 339 8. Jarvis ED, Mirarab S, Aberer AJ, Li B, Houde P, Li C, et al. Whole-genome analyses  
42 340 resolve early branches in the tree of life of modern birds. *Science.* 2014;346  
43 341 6215:1320-31. doi:10.1126/science.1253451.
- 44 342 9. Zhang G, Li C, Li Q, Li B, Larkin DM, Lee C, et al. Comparative genomics reveals  
45 343 insights into avian genome evolution and adaptation. *Science.* 2014;346 6215:1311-  
46 344 20. doi:10.1126/science.1251385.
- 47 345 10. Zhang G, Li B, Li C, Gilbert MT, Jarvis ED, Wang J, et al. Comparative genomic data  
48 346 of the Avian Phylogenomics Project. *Gigascience.* 2014;3 1:26. doi:10.1186/2047-  
49 347 217X-3-26.
- 50 348 11. Lee HC, Choi HJ, Park TS, Lee SI, Kim YM, Rengaraj D, et al. Cleavage events and  
51 349 sperm dynamics in chick intrauterine embryos. *PLoS One.* 2013;8 11:e80631.  
52 350 doi:10.1371/journal.pone.0080631.
- 53 351 12. Hwang YS, Seo M, Bang S, Kim H and Han JY. Transcriptional and translational  
54 352 dynamics during maternal-to-zygotic transition in early chicken development. *FASEB*  
55 353 *journal : official publication of the Federation of American Societies for Experimental*  
56 354 *Biology.* 2017; doi:10.1096/fj.201700955R.

- 1 355 13. Gilbert I, Scantland S, Sylvestre EL, Gravel C, Laflamme I, Sirard MA, et al. The  
2 356 dynamics of gene products fluctuation during bovine pre-hatching development. *Mol*  
3 357 *Reprod Dev.* 2009;76 8:762-72. doi:10.1002/mrd.21030.
- 4 358 14. Bolger AM, Lohse M and Usadel B. Trimmomatic: a flexible trimmer for Illumina  
5 359 sequence data. *Bioinformatics.* 2014:btu170.
- 6 360 15. Andrews S. FastQC: A quality control tool for high throughput sequence data.  
7 361 Reference Source. 2010.
- 8 362 16. Durruthy-Durruthy J, Sebastiano V, Wossidlo M, Cepeda D, Cui J, Grow EJ, et al.  
9 363 The primate-specific noncoding RNA HPAT5 regulates pluripotency during human  
10 364 preimplantation development and nuclear reprogramming. *Nat Genet.* 2016;48 1:44-  
11 364 52. doi:10.1038/ng.3449.
- 12 365 17. Jeong H, Sung S, Kwon T, Seo M, Caetano-Anollés K, Choi SH, et al. HGTree:  
13 366 database of horizontally transferred genes determined by tree reconciliation. *Nucleic*  
14 367 *acids research.* 2015;44 D1:D610-D9.
- 15 368 18. Li H, Handsaker B, Wysoker A, Fennell T, Ruan J, Homer N, et al. The sequence  
16 369 alignment/map format and SAMtools. *Bioinformatics.* 2009;25 16:2078-9.
- 17 370 19. Love MI, Huber W and Anders S. Moderated estimation of fold change and  
18 371 dispersion for RNA-seq data with DESeq2. *Genome biology.* 2014;15 12:550.
- 19 372 20. Hwang YS, Seo M, Choi HJ, Kim SK, Kim H, Han JY, Supporting data for "The first  
20 373 whole transcriptomic exploration of pre-oviposited early chicken embryos using single  
21 374 and bulked embryonic RNA-sequencing". *GigaScience Database* 2018.  
22 375 <http://dx.doi.org/10.5524/100418>  
23 376

24 377

25 378

26 379

27 380

28 381

29 382

30 383

31 384

32 385

33 386

34 387

35 388

36 389

37 390

38 391

39 392

40 393

41 394

42 395

43 396

44 397

45 398

46 399

47 400

48 401

49 402

50 403

16  
17  
18  
19  
20  
21  
22  
23  
24  
25  
26  
27  
28  
29  
30  
31  
32  
33  
34  
35  
36  
37  
38  
39  
40  
41  
42  
43  
44  
45  
46  
47  
48  
49  
50  
51  
52  
53  
54  
55  
56  
57  
58  
59  
60  
61  
62  
63  
64  
65

379 **Table 1.** Summary statistics of the RNA-seq processing

| Bulked embryonic sequencing |                 |                 |                              |                              |                                 |                                 |                         |                         |
|-----------------------------|-----------------|-----------------|------------------------------|------------------------------|---------------------------------|---------------------------------|-------------------------|-------------------------|
| Samples                     | QC passed reads | QC passing rate | Deduplicated Percentage (R1) | Deduplicated Percentage (R2) | Uniquely mapped ratio (Galgal4) | Uniquely mapped ratio (Galgal5) | Mapping rates (Galgal4) | Mapping rates (Galgal5) |
| Oocyte_S1_Bulked            | 56024575        | 94.81%          | 37.83%                       | 44.47%                       | 83.82%                          | 99.56%                          | 82.73%                  | 84.32%                  |
| Oocyte_S2_Bulked            | 56043780        | 94.14%          | 35.35%                       | 42.25%                       | 81.27%                          | 99.34%                          | 82.77%                  | 79.54%                  |
| Oocyte_S3_Bulked            | 59498675        | 95.54%          | 35.84%                       | 43.31%                       | 84.03%                          | 99.58%                          | 82.16%                  | 82.39%                  |
| Zygote_S1_Bulked            | 53378148        | 96.74%          | 30.17%                       | 37.65%                       | 84.77%                          | 99.74%                          | 82.43%                  | 85.89%                  |
| Zygote_S2_Bulked            | 53999584        | 96.77%          | 26.44%                       | 35.21%                       | 84.20%                          | 99.73%                          | 82.19%                  | 79.86%                  |
| Zygote_S3_Bulked            | 50027929        | 98.02%          | 25.13%                       | 39.78%                       | 86.17%                          | 99.76%                          | 80.90%                  | 87.58%                  |
| EGK.I_S1_Bulked             | 56909314        | 97.36%          | 27.88%                       | 39.30%                       | 86.28%                          | 86.01%                          | 74.55%                  | 70.70%                  |
| EGK.I_S2_Bulked             | 61447014        | 97.94%          | 21.97%                       | 36.34%                       | 87.13%                          | 86.86%                          | 73.24%                  | 68.64%                  |
| EGK.I_S3_Bulked             | 50188847        | 96.80%          | 28.24%                       | 37.31%                       | 85.33%                          | 84.67%                          | 81.34%                  | 77.01%                  |
| EGK.III_S1_Bulked           | 60876681        | 97.30%          | 25.31%                       | 36.29%                       | 85.09%                          | 86.05%                          | 76.06%                  | 69.37%                  |
| EGK.III_S2_Bulked           | 56357690        | 97.90%          | 25.78%                       | 38.44%                       | 86.55%                          | 86.28%                          | 75.20%                  | 70.47%                  |
| EGK.III_S3_Bulked           | 45715485        | 98.02%          | 28.17%                       | 41.24%                       | 86.72%                          | 86.32%                          | 75.30%                  | 70.38%                  |
| EGK.VI_S1_Bulked            | 62075038        | 97.53%          | 27.00%                       | 42.86%                       | 86.62%                          | 86.77%                          | 71.14%                  | 63.68%                  |
| EGK.VI_S2_Bulked            | 65223164        | 97.77%          | 23.36%                       | 34.43%                       | 85.85%                          | 85.61%                          | 80.95%                  | 72.89%                  |
| EGK.VI_S3_Bulked            | 49604292        | 98.16%          | 27.31%                       | 41.37%                       | 86.86%                          | 86.44%                          | 75.12%                  | 69.22%                  |



16  
17  
18  
19  
20  
21  
22  
23  
24  
25  
26  
27  
28  
29  
30  
31  
32  
33  
34  
35  
36  
37  
38  
39  
40  
41  
42  
43  
44  
45  
46  
47  
48  
49  
50  
51  
52  
53  
54  
55  
56  
57  
58  
59  
60  
61  
62  
63  
64  
65

|                                            |             |             |        |        |        |        |        |        |
|--------------------------------------------|-------------|-------------|--------|--------|--------|--------|--------|--------|
| EGK.VIII_S1_Bulked                         | 67401388    | 97.35%      | 36.30% | 50.09% | 87.21% | 86.30% | 70.10% | 67.32% |
| EGK.VIII_S2_Bulked                         | 56396268    | 96.82%      | 35.34% | 51.04% | 87.61% | 87.25% | 66.53% | 60.37% |
| EGK.VIII_S3_Bulked                         | 71309063    | 97.44%      | 33.44% | 49.01% | 86.81% | 85.62% | 70.68% | 70.70% |
| EGK.X_S1_Bulked                            | 67730502    | 95.70%      | 41.09% | 52.23% | 86.37% | 85.54% | 72.24% | 69.29% |
| EGK.X_S2_Bulked                            | 74109500    | 95.02%      | 42.83% | 54.66% | 86.60% | 85.48% | 70.64% | 69.62% |
| EGK.X_S3_Bulked                            | 63225919    | 94.65%      | 42.42% | 54.85% | 86.86% | 85.82% | 71.13% | 69.51% |
| <b>Average</b>                             | 58930612.19 | 0.967514286 | 31.30% | 42.96% | 85.82% | 89.94% | 76.06% | 73.27% |
| <b>Single embryonic or cell sequencing</b> |             |             |        |        |        |        |        |        |
| Oocyte_S1_SingleCell                       | 23558381    | 86.61%      | 42.82% | 45.68% | 79.90% | 78.06% | 86.28% | 86.67% |
| Oocyte_S2_SingleCell                       | 53963445    | 84.75%      | 54.54% | 58.84% | 81.28% | 79.71% | 85.95% | 85.86% |
| Oocyte_S3_SingleCell                       | 24660386    | 84.95%      | 52.01% | 56.95% | 81.79% | 79.99% | 84.95% | 84.33% |
| Zygote_S1_SingleEmbryo                     | 31742857    | 87.17%      | 27.95% | 32.85% | 81.75% | 80.66% | 84.32% | 84.40% |
| Zygote_S2_SingleEmbryo                     | 91033778    | 85.72%      | 37.12% | 42.18% | 81.62% | 80.14% | 76.59% | 76.15% |
| Zygote_S3_SingleEmbryo                     | 27687195    | 87.60%      | 36.35% | 41.48% | 81.57% | 80.07% | 86.02% | 85.96% |
| EGK.X_S1_SingleEmbryo                      | 30914824    | 86.41%      | 47.58% | 51.56% | 85.27% | 82.92% | 83.67% | 83.16% |
| EGK.X_S2_SingleEmbryo                      | 47159061    | 86.29%      | 53.42% | 58.46% | 82.40% | 80.75% | 88.38% | 89.10% |
| EGK.X_S3_SingleEmbryo                      | 29006546    | 85.94%      | 51.19% | 55.97% | 82.20% | 80.59% | 83.57% | 82.86% |
| <b>Average</b>                             | 39969608.11 | 0.8616      | 44.78% | 49.33% | 81.98% | 80.32% | 84.41% | 84.27% |

380

15  
16  
17  
18  
19  
20  
21  
22  
23  
24  
25  
26  
27  
28  
29  
30  
31  
32  
33  
34  
35  
36  
37  
38  
39  
40  
41  
42  
43  
44  
45  
46  
47  
48  
49  
50  
51  
52  
53  
54  
55  
56  
57  
58  
59  
60  
61  
62  
63  
64  
65

381

1 382 **Table 2.** Comparison of Galgal4 and Galgal5 gene annotations

| <b>RNAs</b>    | <b>Annotated<br/>in Galgal4 only</b> | <b>Commonly<br/>annotated</b> | <b>Annotated<br/>in Galgal5 only</b> |
|----------------|--------------------------------------|-------------------------------|--------------------------------------|
| lincRNA        | 0                                    | 0                             | 5,166                                |
| miRNA          | 204                                  | 487                           | 253                                  |
| misc_RNA       | 15                                   | 71                            | 43                                   |
| Mt_rRNA        | 2                                    | 0                             | 2                                    |
| Mt_tRNA        | 10                                   | 0                             | 14                                   |
| protein_coding | 4,892                                | 10,213                        | 5,613                                |
| pseudogene     | 29                                   | 10                            | 25                                   |
| rRNA           | 6                                    | 8                             | 58                                   |
| scaRNA         | 0                                    | 0                             | 4                                    |
| snoRNA         | 41                                   | 172                           | 44                                   |
| snRNA          | 7                                    | 40                            | 30                                   |
| Total          | 5,206                                | 11,001                        | 11,252                               |

24 383

26 384

27  
28  
29  
30  
31  
32  
33  
34  
35  
36  
37  
38  
39  
40  
41  
42  
43  
44  
45  
46  
47  
48  
49  
50  
51  
52  
53  
54  
55  
56  
57  
58  
59  
60  
61  
62  
63  
64  
65

1 385 **Figure legends**

2  
3 386 **Fig. 1.** The bulked and single embryonic RNA-Sequencing (RNA-Seq) in early chicken  
4  
5 387 development. a) The diagram of bulked embryonic RNA-seq. Total 137 pre-oviposited  
6  
7 388 embryos were collected. Each replicate contains from three to ten embryos pooled. The  
8  
9 bulked embryo RNA-Seq was performed in triplicate. b) The diagram of single embryonic  
10 389 RNA-Seq. The single oocyte, zygote, and Eyal-giladi and Kochav stage X (EGK.X)  
11  
12 390 blastoderm were obtained from one hen simultaneously. Samples was collected from three  
13  
14 391 hen. Single embryo was sequenced as one replicate and each stage consists of triplicated  
15  
16 392 embryos from three hen, respectively. c) The representative stages of chicken early embryos  
17  
18 393 used for RNA-Seq. Dorsal views of whole embryos from the oocyte to EGK.X are shown. A  
19  
20 394 germinal vesicle oocyte in the ovary and fertilized zygote in the magnum without cleavage  
21  
22 395 were obtained. The intrauterine embryos were obtained 5.5 (EGK.I), 8.5 (EGK.III), 15.5  
23  
24 396 (EGK.VI), and 20.5 (EGK.VIII) h after fertilization. The EGK.X embryo was obtained after  
25  
26 397 oviposition. Scale bar, 1000  $\mu$ m.  
27  
28  
29  
30  
31

32 399  
33  
34 400 **Fig. 2.** Collection of bulked and single embryos during early chicken development. a) The  
35  
36 401 number of embryos in each sample. b) The RNA concentration and c) total amount of RNA  
37  
38 402 for each stage used in RNA-Seq. d) The estimated total RNA per embryo in the bulked  
39  
40 403 samples and the total amount of RNA in a single embryo. The RNA concentration, amount of  
41  
42 404 RNA, and total RNA per embryo did not differ significantly among the groups (Kruskal–Wallis  
43  
44 405 test,  $P > 0.05$ ).  
45  
46  
47  
48 406  
49

50 407 **Fig. 3.** Comparison of two different builds of gene annotation for the early chicken embryo  
51  
52 408 samples. a) Using the Ensembl annotation with the two different genome builds, annotated  
53  
54 409 genes were compared based on the Ensembl ID. As a result, 5,657 and 14,651 Ensembl IDs  
55  
56 410 were identified in Galgal4 and Galgal5, respectively, while 11,451 Ensembl IDs are common  
57  
58 411 to the two different annotations. b) Based on the expressed genes at any stage of the  
59  
60  
61  
62  
63  
64  
65

1 412 chicken early embryos, the gene lists were compared between Galgal4 and Galgal5. c)  
2  
3 413 Investigation of the change in annotated genes in Galgal5 among genes expressed in early  
4  
5 414 chicken embryos. As a result, a large number of lincRNAs was added as new features in  
6  
7 415 Galgal5. d) A correlation analysis of the total gene expression based on 11,001 common  
8  
9  
10 416 annotated genes shared between Galgal4 and Galgal5.

11  
12 417  
13  
14 418 **Fig. 4.** Multidimensional scaling plots based on all annotated genes in Galgal4 and Galgal5.  
15  
16 419 The gene expression patterns of early chicken embryos quantified based on Galgal4 were  
17  
18 clearly differentiated by developmental stage regardless of the sequencing technique used.  
19 420  
20  
21 421 In comparison, there was a difference between the bulked and single embryo sequencing  
22  
23 422 techniques in the oocyte and zygote in Galgal5. The first dimension (Coordinate 1) is the  
24  
25 progression of developmental stages in a negative direction during intrauterine development  
26 423  
27  
28 424 and the second dimension (Coordinate 2) is the difference between oocyte and fertilized  
29  
30 425 embryos from zygote to EGK.X.  
31  
32  
33  
34  
35  
36  
37  
38  
39  
40  
41  
42  
43  
44  
45  
46  
47  
48  
49  
50  
51  
52  
53  
54  
55  
56  
57  
58  
59  
60  
61  
62  
63  
64  
65

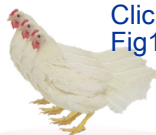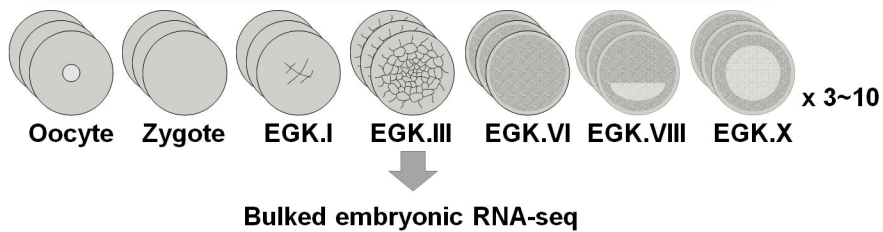**b**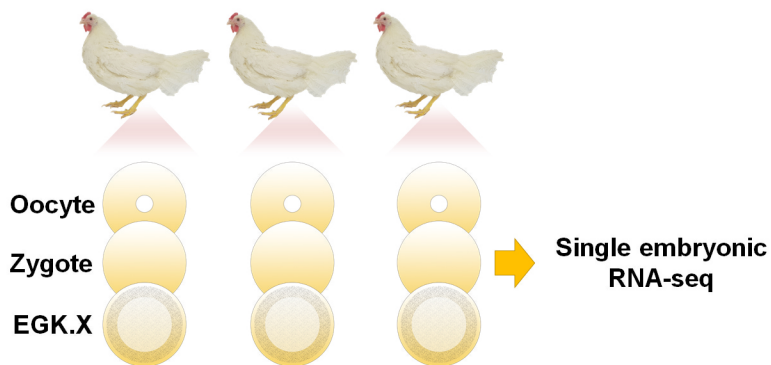**c**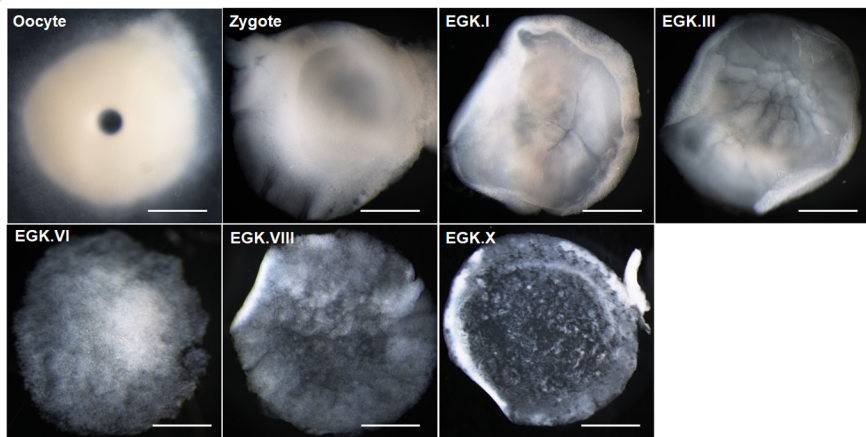

Figure 2

[Click here to download Figure Fig2.pdf](#)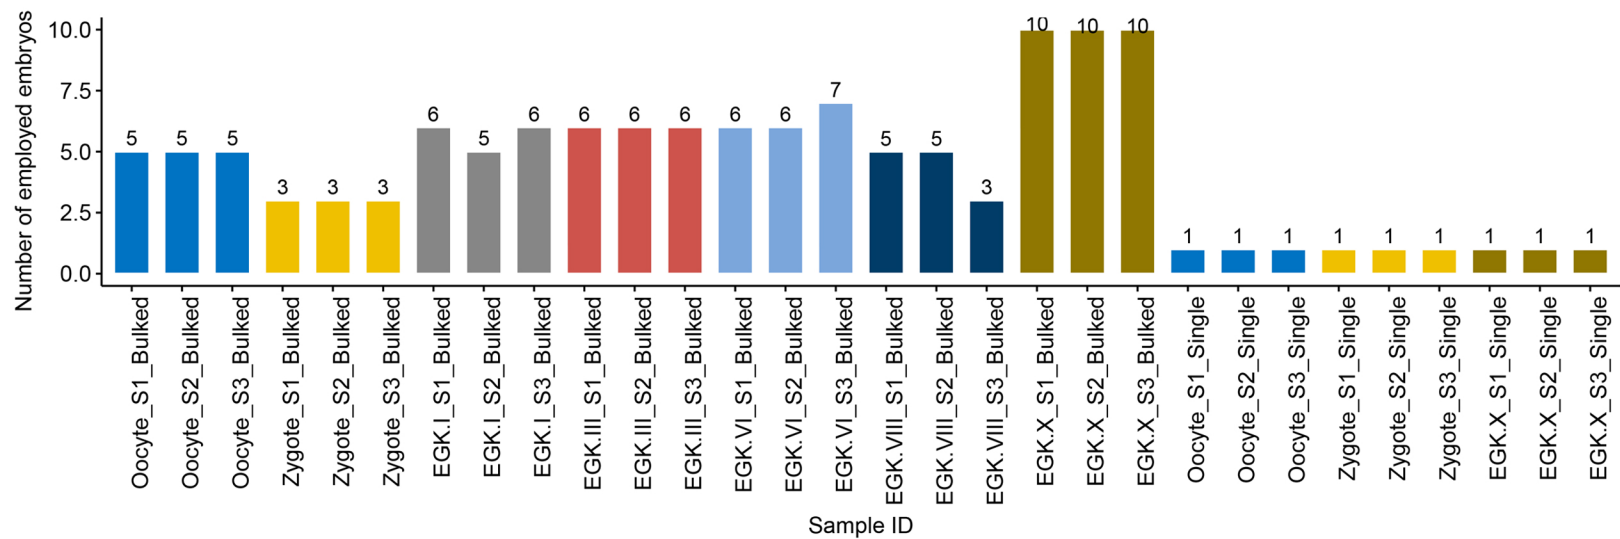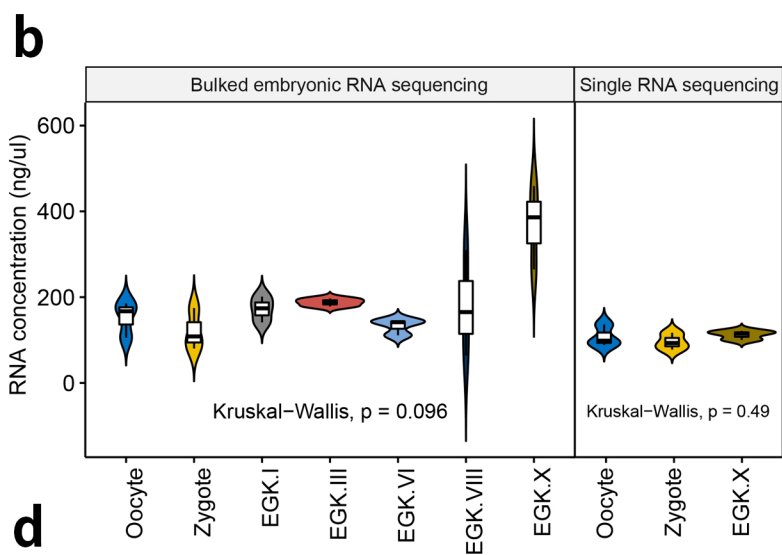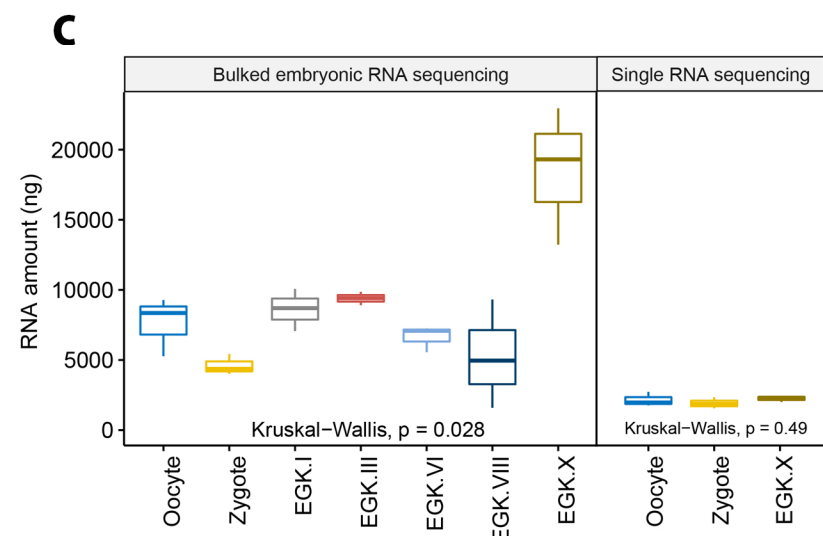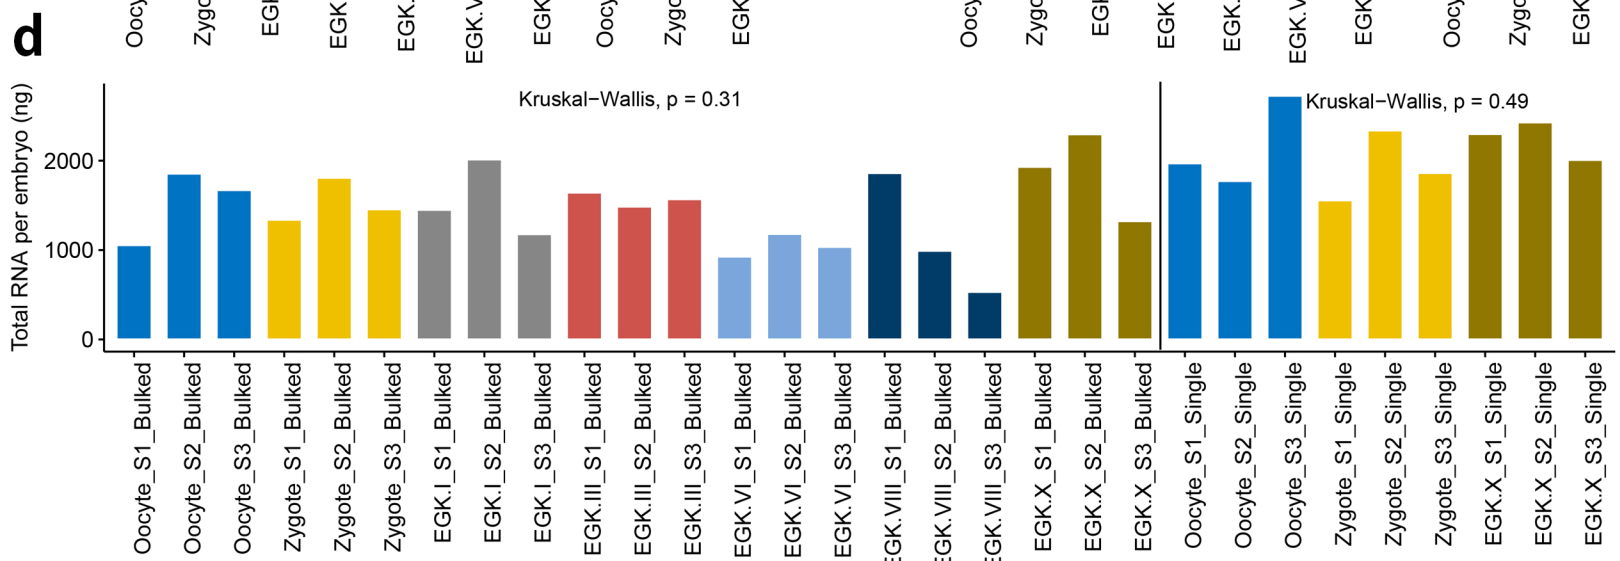

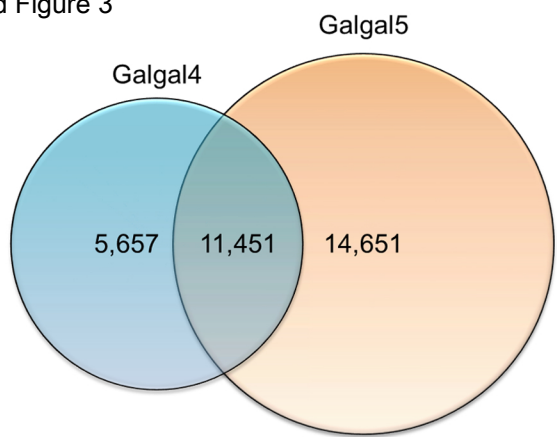

Based on the whole annotated genes

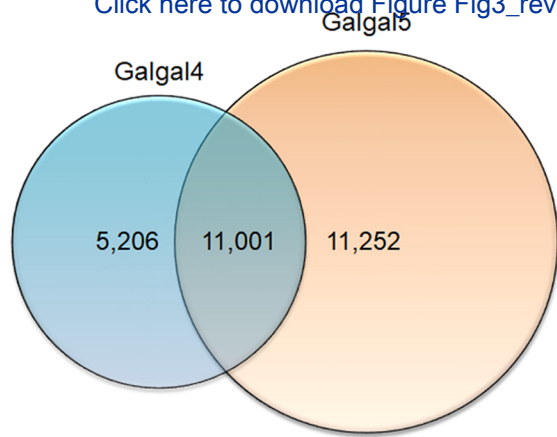

Based on the expressed genes in chicken early embryo

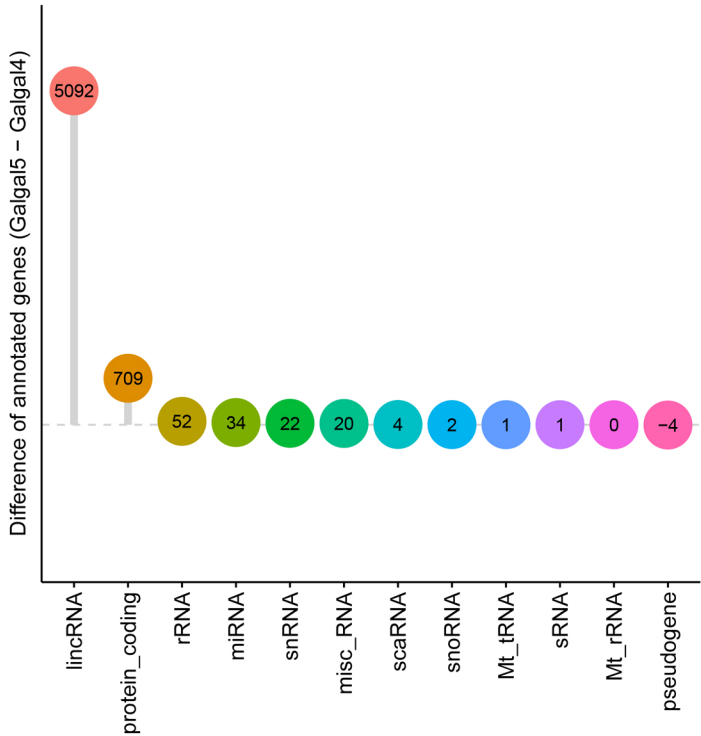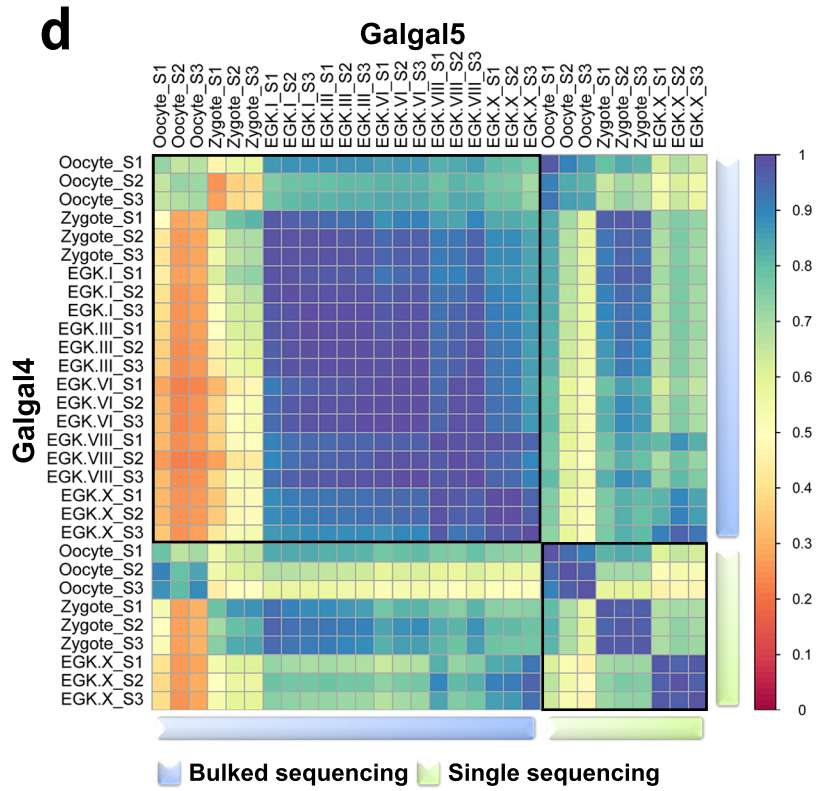



Figure 4

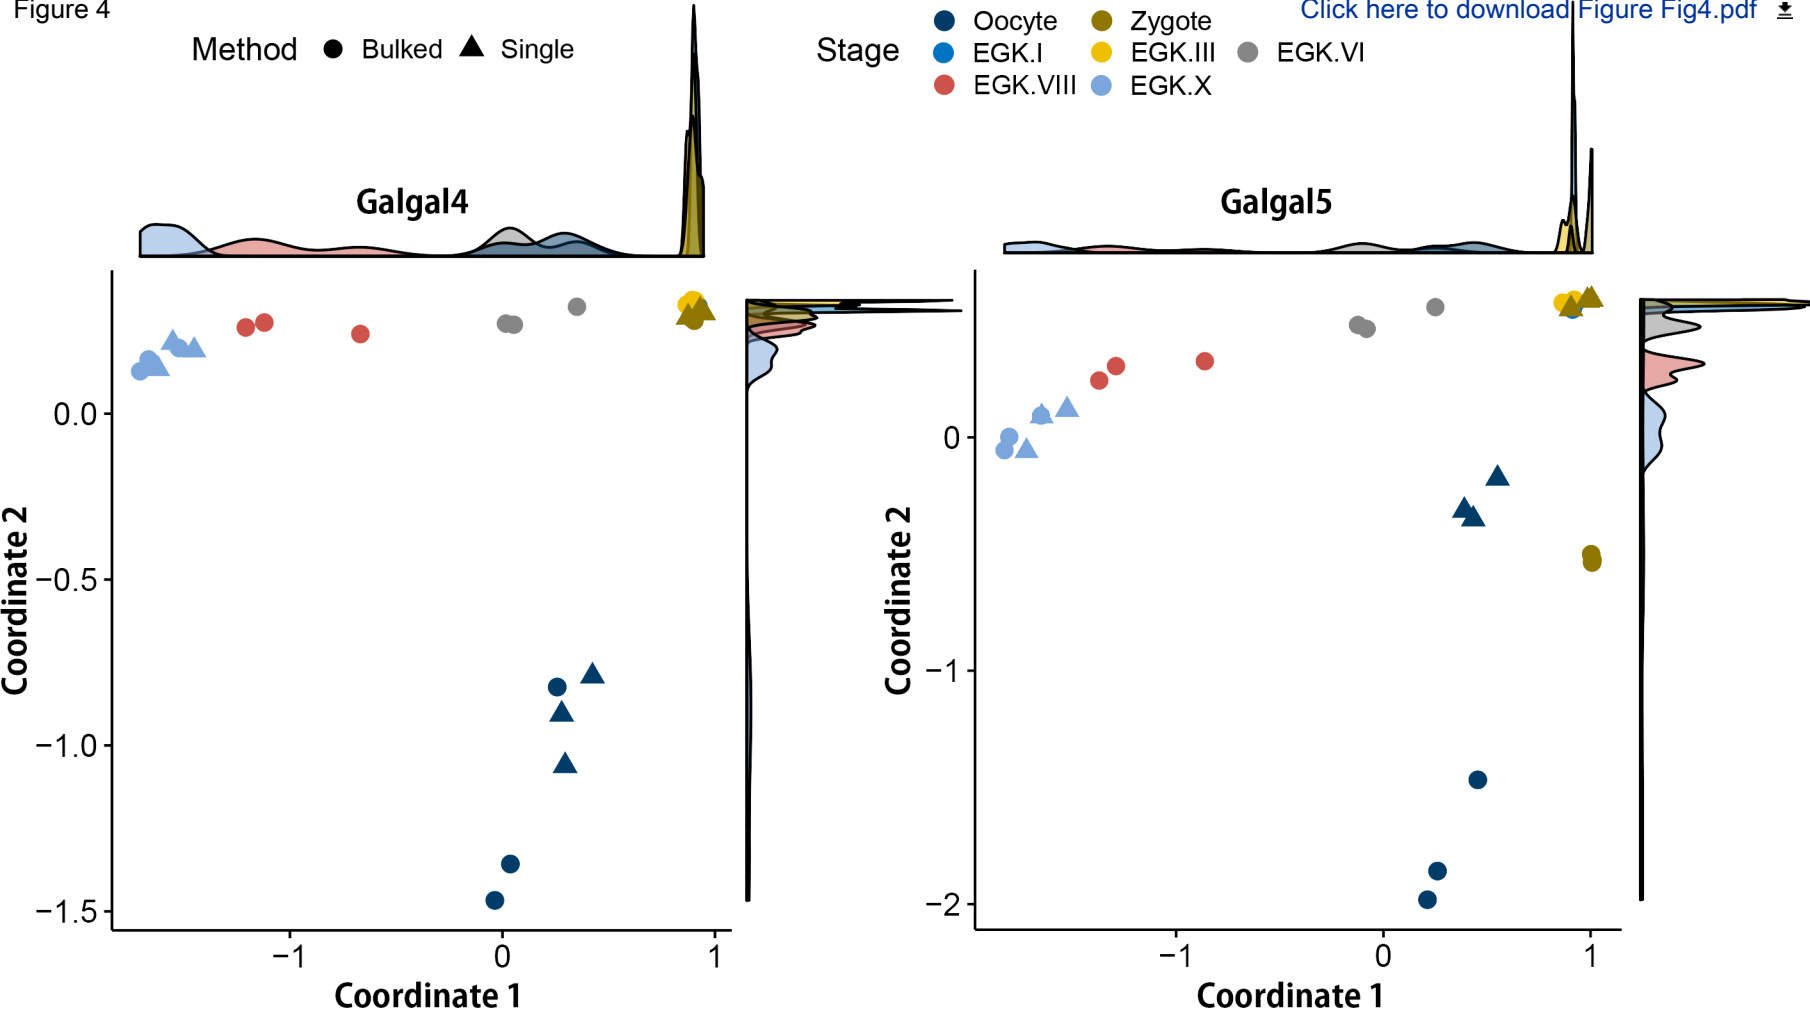

[Click here to download Figure Fig4.pdf](#)

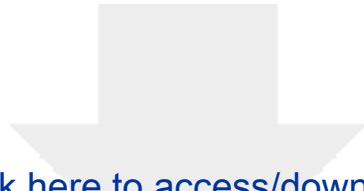

Click here to access/download  
**Supplementary Material**  
171230\_Supplementary file 1.docx

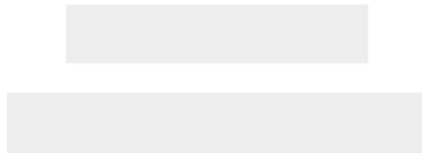

Supplement: giy030_giga-d-17-00277_revision_1.pdf [file giy030_giga-d-17-00277_revision_1.pdf]
