# Supplementary material for: The first whole transcriptomic exploration of pre-oviposited early chicken embryos using single and bulked embryonic RNA-sequencing
Source: PubMed Central journal article supplement (PMC5893961; doi:10.1093/gigascience/giy030), 2018-03-24
Supplement: giy030_giga-d-17-00277_original_submission.pdf [file giy030_giga-d-17-00277_original_submission.pdf]

## The first whole transcriptomic exploration of pre-oviposited early chicken embryos using single and bulked embryonic RNA-sequencing --Manuscript Draft--

|                                                      |                                                                                                                                                                                                                                                                                                                                                                                                                                                                                                                                                                                                                                                                                                                                                                                                                                                                                                                                                                                                                                                                                                                                                                                                                                                                                                                                                                                                                                                                                                                                                          |                    |
|------------------------------------------------------|----------------------------------------------------------------------------------------------------------------------------------------------------------------------------------------------------------------------------------------------------------------------------------------------------------------------------------------------------------------------------------------------------------------------------------------------------------------------------------------------------------------------------------------------------------------------------------------------------------------------------------------------------------------------------------------------------------------------------------------------------------------------------------------------------------------------------------------------------------------------------------------------------------------------------------------------------------------------------------------------------------------------------------------------------------------------------------------------------------------------------------------------------------------------------------------------------------------------------------------------------------------------------------------------------------------------------------------------------------------------------------------------------------------------------------------------------------------------------------------------------------------------------------------------------------|--------------------|
| <b>Manuscript Number:</b>                            | GIGA-D-17-00277                                                                                                                                                                                                                                                                                                                                                                                                                                                                                                                                                                                                                                                                                                                                                                                                                                                                                                                                                                                                                                                                                                                                                                                                                                                                                                                                                                                                                                                                                                                                          |                    |
| <b>Full Title:</b>                                   | The first whole transcriptomic exploration of pre-oviposited early chicken embryos using single and bulked embryonic RNA-sequencing                                                                                                                                                                                                                                                                                                                                                                                                                                                                                                                                                                                                                                                                                                                                                                                                                                                                                                                                                                                                                                                                                                                                                                                                                                                                                                                                                                                                                      |                    |
| <b>Article Type:</b>                                 | Data Note                                                                                                                                                                                                                                                                                                                                                                                                                                                                                                                                                                                                                                                                                                                                                                                                                                                                                                                                                                                                                                                                                                                                                                                                                                                                                                                                                                                                                                                                                                                                                |                    |
| <b>Funding Information:</b>                          | National Research Foundation of Korea (2015R1A3A2033826)                                                                                                                                                                                                                                                                                                                                                                                                                                                                                                                                                                                                                                                                                                                                                                                                                                                                                                                                                                                                                                                                                                                                                                                                                                                                                                                                                                                                                                                                                                 | Prof. Jae Yong Han |
| <b>Abstract:</b>                                     | <p><b>Background</b><br/>The chicken is a valuable model organism, especially in evolutionary and embryology research because its embryonic development occurs in the egg. However, despite its scientific importance, no transcriptome data have been generated for deciphering the early developmental stages of the chicken because of practical and technical constraints accessing pre-oviposited embryos.</p> <p><b>Findings</b><br/>Here, we determine the entire transcriptome of pre-oviposited avian embryos, including oocyte, zygote, and intrauterine embryos from Eyal-giladi and Kochav stage I (EGK.I) to EGK.X collected using a non-invasive approach for the first time. We also compare RNA-sequencing data obtained using bulked embryo sequencing and single embryo/cell sequencing technique. The raw sequencing data were pre-processed with two different genome builds, Galgal4 and Galgal5, and the expression of 17,108 and 26,102 genes was quantified in the respective builds. There were some differences between the two techniques, as well as between the two genome builds, and these were affected by the emergence of long intergenic non-coding RNA annotations.</p> <p><b>Conclusion</b><br/>The first transcriptome datasets of pre-oviposited early chicken embryos based on bulked and single embryo sequencing techniques will serve as a valuable resource for investigating early avian embryogenesis, for comparative studies among vertebrates, and for novel gene annotation in the chicken genome.</p> |                    |
| <b>Corresponding Author:</b>                         | Jae Yong Han, Ph.D.<br>Seoul National University<br>Gwanak-gu, Seoul KOREA, REPUBLIC OF                                                                                                                                                                                                                                                                                                                                                                                                                                                                                                                                                                                                                                                                                                                                                                                                                                                                                                                                                                                                                                                                                                                                                                                                                                                                                                                                                                                                                                                                  |                    |
| <b>Corresponding Author Secondary Information:</b>   |                                                                                                                                                                                                                                                                                                                                                                                                                                                                                                                                                                                                                                                                                                                                                                                                                                                                                                                                                                                                                                                                                                                                                                                                                                                                                                                                                                                                                                                                                                                                                          |                    |
| <b>Corresponding Author's Institution:</b>           | Seoul National University                                                                                                                                                                                                                                                                                                                                                                                                                                                                                                                                                                                                                                                                                                                                                                                                                                                                                                                                                                                                                                                                                                                                                                                                                                                                                                                                                                                                                                                                                                                                |                    |
| <b>Corresponding Author's Secondary Institution:</b> |                                                                                                                                                                                                                                                                                                                                                                                                                                                                                                                                                                                                                                                                                                                                                                                                                                                                                                                                                                                                                                                                                                                                                                                                                                                                                                                                                                                                                                                                                                                                                          |                    |
| <b>First Author:</b>                                 | Young Sun Hwang                                                                                                                                                                                                                                                                                                                                                                                                                                                                                                                                                                                                                                                                                                                                                                                                                                                                                                                                                                                                                                                                                                                                                                                                                                                                                                                                                                                                                                                                                                                                          |                    |
| <b>First Author Secondary Information:</b>           |                                                                                                                                                                                                                                                                                                                                                                                                                                                                                                                                                                                                                                                                                                                                                                                                                                                                                                                                                                                                                                                                                                                                                                                                                                                                                                                                                                                                                                                                                                                                                          |                    |
| <b>Order of Authors:</b>                             | Young Sun Hwang<br>Minseok Seo<br>Hee Jung Choi<br>Sang Kyung Kim<br>Heebal Kim<br>Jae Yong Han, Ph.D.                                                                                                                                                                                                                                                                                                                                                                                                                                                                                                                                                                                                                                                                                                                                                                                                                                                                                                                                                                                                                                                                                                                                                                                                                                                                                                                                                                                                                                                   |                    |
| <b>Order of Authors Secondary Information:</b>       |                                                                                                                                                                                                                                                                                                                                                                                                                                                                                                                                                                                                                                                                                                                                                                                                                                                                                                                                                                                                                                                                                                                                                                                                                                                                                                                                                                                                                                                                                                                                                          |                    |
| <b>Opposed Reviewers:</b>                            |                                                                                                                                                                                                                                                                                                                                                                                                                                                                                                                                                                                                                                                                                                                                                                                                                                                                                                                                                                                                                                                                                                                                                                                                                                                                                                                                                                                                                                                                                                                                                          |                    |
| <b>Additional Information:</b>                       |                                                                                                                                                                                                                                                                                                                                                                                                                                                                                                                                                                                                                                                                                                                                                                                                                                                                                                                                                                                                                                                                                                                                                                                                                                                                                                                                                                                                                                                                                                                                                          |                    |

| Question                                                                                                                                                                                                                                                                                                                                                                                                                                                                                                                                                | Response   |
|---------------------------------------------------------------------------------------------------------------------------------------------------------------------------------------------------------------------------------------------------------------------------------------------------------------------------------------------------------------------------------------------------------------------------------------------------------------------------------------------------------------------------------------------------------|------------|
| <p>Are you submitting this manuscript to a special series or article collection?</p>                                                                                                                                                                                                                                                                                                                                                                                                                                                                    | <p>No</p>  |
| <p><b>Experimental design and statistics</b></p> <p>Full details of the experimental design and statistical methods used should be given in the Methods section, as detailed in our <a href="#">Minimum Standards Reporting Checklist</a>. Information essential to interpreting the data presented should be made available in the figure legends.</p> <p>Have you included all the information requested in your manuscript?</p>                                                                                                                      | <p>Yes</p> |
| <p><b>Resources</b></p> <p>A description of all resources used, including antibodies, cell lines, animals and software tools, with enough information to allow them to be uniquely identified, should be included in the Methods section. Authors are strongly encouraged to cite <a href="#">Research Resource Identifiers</a> (RRIDs) for antibodies, model organisms and tools, where possible.</p> <p>Have you included the information requested as detailed in our <a href="#">Minimum Standards Reporting Checklist</a>?</p>                     | <p>Yes</p> |
| <p><b>Availability of data and materials</b></p> <p>All datasets and code on which the conclusions of the paper rely must be either included in your submission or deposited in <a href="#">publicly available repositories</a> (where available and ethically appropriate), referencing such data using a unique identifier in the references and in the “Availability of Data and Materials” section of your manuscript.</p> <p>Have you have met the above requirement as detailed in our <a href="#">Minimum Standards Reporting Checklist</a>?</p> | <p>Yes</p> |

1 **1 The first whole transcriptomic exploration of pre-oviposited early chicken**  
2  
3  
4 **2 embryos using single and bulked embryonic RNA-sequencing**  
5  
6  
7

8 4 Young Sun Hwang<sup>1,†</sup>, Minseok Seo<sup>2,3,†</sup>, Hee Jung Choi<sup>1</sup>, Sang Kyung Kim<sup>1</sup>, Heebal Kim<sup>1,2,4</sup>,  
9  
10 5 and Jae Yong Han<sup>1,4,\*</sup>  
11

12 6 †These authors contributed equally to this work  
13  
14  
15  
16

17 8 \*Corresponding Author  
18

19 9 Jae Yong Han, Ph.D.  
20

21 10 Seoul National University, 1 Gwanak-ro, Gwanak-gu, Seoul 08826, Korea  
22

23 11 Phone: +82-2-880-4810  
24

25 12 FAX: +82-2-874-4811  
26

27 13 E-mail: jaehan@snu.ac.kr  
28  
29  
30  
31  
32  
33  
34  
35  
36  
37  
38  
39  
40  
41  
42  
43  
44  
45  
46  
47  
48  
49  
50  
51  
52  
53  
54  
55  
56  
57  
58  
59  
60  
61  
62  
63  
64  
65

1 15 **Abstract**

2  
3 16 **Background**

4  
5 17 The chicken is a valuable model organism, especially in evolutionary and embryology  
6  
7  
8 18 research because its embryonic development occurs in the egg. However, despite its  
9  
10 19 scientific importance, no transcriptome data have been generated for deciphering the early  
11  
12 20 developmental stages of the chicken because of practical and technical constraints  
13  
14 21 accessing pre-oviposited embryos.

15  
16  
17 22 **Findings**

18  
19 23 Here, we determine the entire transcriptome of pre-oviposited avian embryos, including  
20  
21 24 oocyte, zygote, and intrauterine embryos from Eyal-giladi and Kochav stage I (EGK.I) to  
22  
23 25 EGK.X collected using a non-invasive approach for the first time. We also compare RNA-  
24  
25 26 sequencing data obtained using bulked embryo sequencing and single embryo/cell  
27  
28 27 sequencing technique. The raw sequencing data were pre-processed with two different  
29  
30 28 genome builds, Galgal4 and Galgal5, and the expression of 17,108 and 26,102 genes was  
31  
32 29 quantified in the respective builds. There were some differences between the two techniques,  
33  
34 30 as well as between the two genome builds, and these were affected by the emergence of  
35  
36 31 long intergenic non-coding RNA annotations.

37  
38  
39 32 **Conclusion**

40  
41 33 The first transcriptome datasets of pre-oviposited early chicken embryos based on bulked  
42  
43 34 and single embryo sequencing techniques will serve as a valuable resource for investigating  
44  
45 35 early avian embryogenesis, for comparative studies among vertebrates, and for novel gene  
46  
47 36 annotation in the chicken genome.

48  
49  
50 37 **Keywords**

51  
52 38 RNA-seq - Single embryonic sequencing - Single cell sequencing - Early embryo - Chicken  
53  
54  
55  
56  
57  
58  
59  
60  
61  
62  
63  
64  
65



## 39 **Background**

40 Avian species are valuable animal models in many research areas, especially in embryology,  
41 because the avian embryo develops in an egg before hatching. This is an excellent *in vitro*-  
42 like *in vivo* system that has allowed extensive research of the developmental events during  
43 embryogenesis. Previous studies have examined primitive streak formation and gastrulation  
44 after oviposition in avian species [1–4]. Nevertheless, despite the importance of the initial  
45 events in avian embryogenesis before oviposition, only a few morphological studies have  
46 examined pre-oviposited embryos because of practical difficulties accessing the embryos [5–  
47 7]. The temporal regulation of gene expression during the pre-oviposited stages is important  
48 for understanding early embryonic development.

49         Recently, the Bird10K project was initiated because of the intermediate position of  
50 birds in the comparative biology of vertebrates and their broad utility for diverse research.  
51 This project used the genome sequences of 48 species of birds to construct a phylogenetic  
52 hierarchy of avian species and examine the comparative genomics of flight and functional  
53 adaptations [8–10]. However, no transcriptomic approach to early bird embryos has been  
54 performed. Here, we present whole transcriptome sequencing of pre-oviposited chicken  
55 embryos, including oocyte, zygote, and intrauterine embryos from Eyal-giladi and Kochav  
56 stage I (EGK.I) to EGK.X (Fig. 1a). Furthermore, a single oocyte, zygote, and EGK.X  
57 blastoderm from one hen were sequenced (Fig. 1b) and compared with the results for bulked  
58 embryos. Based on the whole transcriptome of early chicken embryos, we mapped our  
59 sequencing reads on the two most recent chicken (*Gallus gallus*) genome references,  
60 Galgal4 and Galgal5, and examined the differences in gene expression between the two  
61 builds with or without long intergenic non-coding RNA (lincRNA) annotations.

## 63 **Data description**

### 64 **Collection of bulked early chicken embryos**

1 65 In the chicken, the initial 25 h of embryonic development from fertilization to oviposition  
2  
3 66 progresses through the oviduct. The mature oocyte on top of the yellow yolk is ovulated into  
4  
5 67 the infundibulum 30 min after oviposition. Then, fertilization occurs and the zygote passes  
6  
7 68 through the magnum without any morphological changes in the embryo. According to the  
8  
9  
10 69 well-defined criteria of Eyal-Giladi and Kochav [5, 6], the first cleavage is observed 5 h after  
11  
12 70 fertilization in the shell gland and has been designated EGK.I. Beginning with this event, the  
13  
14 71 pre-ovipositional development of birds is divided into 10 stages, including the cleavage  
15  
16 72 (EGK.I to EGK.VI) and area pellucida formation (EGK.VII to EGK.X) periods. During the  
17  
18 73 cleavage stages, rapid cellularization and an increase in layers lead to formation of a multi-  
19  
20 74 layered blastula by EGK.VI. In the second half of intrauterine development, the first  
21  
22 75 morphological segregation, including the area pellucida and area opaca regions, occurs with  
23  
24 76 anterior–posterior axis formation and layer reduction. Finally, a thinner, longer, bi-layered  
25  
26 77 blastoderm is established at EGK.X. Based on the morphological dynamics that occur during  
27  
28 78 intrauterine development, we chose critical representative stages to analyze: EGK.I, EGK.III,  
29  
30 79 EGK.VI, EGK.VIII, EGK.X, the oocyte, and the zygote (Fig. 1a).  
31  
32  
33

34 80 The egg-laying times of white leghorn (WL) hens were recorded, and intrauterine  
35  
36 81 eggs from EGK.I–VIII were harvested using an abdominal massage technique [11]. Briefly,  
37  
38 82 the abdomen was pushed gently until the shell gland was exposed; the surface of the shell  
39  
40 83 gland expands when an egg is present for egg shell formation. After expansion of the shell  
41  
42 84 gland surface, massaging was used to move the egg gently towards the cloaca until the  
43  
44 85 intrauterine egg was released. EGK.X blastoderms were collected from WL hens after  
45  
46 86 oviposition. To collect oocytes and zygotes, WL hens were sacrificed and the follicles were  
47  
48 87 collected. Zygote embryos located in the magnum and showing no cleavage were collected  
49  
50 88 within 1 h post-fertilization according to the recorded egg-laying times. All embryos were  
51  
52 89 classified according to morphological criteria (Fig. 1c). All stages were prepared in triplicate  
53  
54 90 and each replicate contained three to seven embryos, while there were ten embryos per  
55  
56  
57  
58  
59  
60  
61  
62  
63  
64  
65

1 91 replicate of the post-oviposited EGK.X blastoderm (Fig. 2a). Shortly after collection, the  
2  
3 92 embryos were separated from the egg using sterilized paper, and the shell membrane and  
4  
5 93 albumen were detached from the yolk. A piece of square filter paper (Whatman, Maidstone,  
6  
7 94 UK) with a hole in the center was placed over the germinal disc. After cutting around the  
8  
9  
10 95 paper containing the embryo, it was gently turned over and transferred to saline to remove  
11  
12 96 the yolk and vitelline membrane and allow embryo collection. Total RNA was isolated from  
13  
14 97 early embryos using TRIzol reagent (Invitrogen, Carlsbad, CA, USA). The quality and  
15  
16 98 quantity of the extracted total RNA were determined using the Trinean DropSense96 system  
17  
18 99 (Trinean, Gentbrugge, Belgium), a RiboGreen kit (Invitrogen), and an Agilent 2100  
20  
21 100 Bioanalyzer (Agilent Technologies, Santa Clara, CA, USA). The average concentration and  
22  
23 101 amount of total RNA in the early stages was 157.7 ng/ $\mu$ L and 7,026.2 ng, respectively, with  
24  
25 102 the exception of EGK.X, which contained 368.9 ng/ $\mu$ L and 18,495.8 ng due to the larger  
26  
27 103 number of embryos pooled (Fig. 2b, c). Based on the amount of total RNA and the number of  
28  
29 104 embryos in each sample, we estimated the total amount of RNA per embryo in each stage.  
30  
31  
32 105 On average, the early chicken embryos contained 1,457 ng of total RNA (Fig. 2d).  
33  
34 106

### 36 107 **Collection of a single oocyte, zygote, and EGK.X blastoderm from one hen**

37 108 In accordance with the estimated amount of total RNA per embryo, a single RNA-rich  
38  
39 109 embryo could be used to perform RNA-sequencing (RNA-Seq) without an amplification  
40  
41 110 technique. In this way, probable sequencing errors due to library amplification from low-input  
42  
43 111 RNA can be avoided. Furthermore, the deviation of transcriptomes among early embryos at  
44  
45 112 the same stage can be examined. Chicken physiology allows a single oocyte, zygote, and  
46  
47 113 EGK.X blastoderm to be collected from one hen at the same time, which minimizes any  
48  
49 114 individual variation and maternal effects (Fig. 1b). On the day when single embryos were  
50  
51 115 acquired, a single EGK.X blastoderm was collected and the time was recorded. Within 1 h  
52  
53 116 post-fertilization according to the recorded egg-laying times, a WL hen was sacrificed and a  
54  
55  
56  
57  
58  
59  
60  
61  
62  
63  
64  
65

1 117 single oocyte and zygote were simultaneously collected. All stages were prepared in  
2  
3 118 triplicate (Fig. 2a). The subsequent steps, including embryo separation and total RNA  
4  
5 119 isolation and quantification, were the same as for the pooled embryos. With the single-  
6  
7 120 embryo approach, the RNA concentration was 105.3 ng/μL and the amount of total RNA  
8  
9 121 averaged 2123.5 ng (Fig. 2b, c). The total amount of RNA for a single embryo was higher  
10  
11 122 and more constant among the different stages than with the bulked embryo collection (Fig.  
12  
13 123 2d).

### 14 124

### 15 125 **Library preparation and whole transcriptome sequencing**

16 126 Total RNA was used to construct cDNA libraries using the TruSeq Stranded Total RNA  
17  
18 127 Sample Preparation kit (Illumina, San Diego, CA, USA). The resulting libraries were  
19  
20 128 subjected to transcriptome analysis using the Illumina NextSeq 500 platform to produce  
21  
22 129 paired 150 base pair reads.  
23  
24  
25  
26  
27  
28  
29  
30  
31

### 32 131 **Summary statistics of pre-processing for RNA-seq data**

33 132 Thirty RNA-seq samples were used in the pre-processing step for the quantification of gene  
34  
35 133 expression in the early developmental stages in the chicken. First, adapter sequences and  
36  
37 134 poor-quality reads were removed from the raw paired-end sequenced files using  
38  
39 135 Trimmomatic ver. 0.33 [12]. The quality of the clean reads was verified using FastQC ver.  
40  
41 136 0.11.2 [13]. On average, 58,930,612 (96.75%) and 39,969,608 (86.16%) paired-end reads  
42  
43 137 remained after the quality-control step for bulked and single-embryo sequencing,  
44  
45 138 respectively (Table 1).  
46  
47  
48  
49

50 139 The clean reads were mapped into the two different builds of the Galgal4 and  
51  
52 140 Galgal5 reference genomes, which were obtained from the Ensembl database. The Galgal4  
53  
54 141 build was the so-called “golden standard” reference chicken genome at the end of 2015, and  
55  
56 142 many studies have employed this build. In December 2016, a new genome build, Galgal5  
57  
58  
59  
60  
61  
62  
63  
64  
65

1 143 (Ref Seq assembly accession: GCA\_000002315.3) and an improved gene model were  
2  
3 144 established using advanced sequencing techniques. One of the features of Galgal5  
4  
5 145 compared with Galgal4 is the different read length used when the gene model was  
6  
7 146 established. This change improved inaccurate gene annotations, especially the structure of  
8  
9  
10 147 isoforms, in existing short-read based gene models through an isoform sequencing  
11  
12 148 technique using the Pacific Biosciences (PacBio) long reads. Furthermore, PacBio long-read  
13  
14 149 sequencing technology makes it possible to establish lincRNAs, which is important in  
15  
16 150 developmental biology [14]. Given that our data were not only an early developmental  
17  
18 151 sample of a chicken but also a sample of all types of RNAs, this must be considered when  
19  
20 152 quantifying gene expression levels in the RNA-seq pipeline. Therefore, we decided to  
21  
22 153 quantify the expression level of the entire transcriptome using the two different versions of  
23  
24 154 the genome builds, and then compared the results to examine the differences. In the  
25  
26 155 alignment step, HISAT2 ver. 2.0.0 [15] was used with the "--rna-strandness RF" option to  
27  
28 156 consider a stranded specific library. As a result, an average of 76.07 and 73.27% mapping  
29  
30 157 rates were observed in Galgal4 and Galgal5, respectively, in the 21 bulked embryo samples  
31  
32 158 and 84.41 and 84.28% were observed in the nine single embryo or cell samples (Table 1).  
33  
34 159 For Galgal4 and Galgal5, the average observed difference in the mapping rate between the  
35  
36 160 bulked and single embryo samples was 8.35 and 11%, respectively. We suspected that this  
37  
38 161 difference in mapping rates was caused by the diversity of genetic information. Since  
39  
40 162 transcriptome data generated using single embryo sequencing technology contains only  
41  
42 163 genetic information for a single entity, it is assumed that the mapping rate is increased by  
43  
44 164 alleviating the heterogeneity problem derived from various genetic backgrounds. We also  
45  
46 165 observed small differences in the average mapping rates (0.028 and 0.001% were  
47  
48 166 decreased in Galgal5, for the bulked and single embryo samples, respectively), which  
49  
50 167 implies that there are no large differences between the two genome builds at the DNA level.  
51  
52 168 Following the alignment step using the two different versions of the genome builds,  
53  
54  
55  
56  
57  
58  
59  
60  
61  
62  
63  
64  
65

1 169 alignment files (.SAM files) were converted into binary alignment files (.BAM) using  
2  
3 170 SAMtools ver. 1.4.1 [16]. Based on the alignment files, the gene expression levels (number  
4  
5 171 of mapped reads) were quantified using HTSeq-count [17] with the Ensembl gene annotation  
6  
7 172 files corresponding to the genome builds (Ensembl release 85 for Galgal4 and 86 for  
8  
9  
10 173 Galgal5). As a result, the number of mapped reads was quantified in each pipeline and  
11  
12 174 17,108 and 26,102 genes were annotated in the Galgal4 and Galgal5 genome builds,  
13  
14 175 respectively.  
15  
16  
17 176

### 18 19 177 **Comparison of the gene expression patterns between Galgal4 and Galgal5 in chicken** 20 21 178 **early embryo samples**

22  
23 179 Based on the mapped-count matrix of the genome builds and the Ensembl annotation, we  
24  
25 180 systematically investigated how many and which types of genes differed between the two  
26  
27 181 genome builds. First, we found that many genes were differentially annotated in each build in  
28  
29 182 terms of their Ensembl IDs (Fig. 3a). Of the 17,108 and 26,102 annotated genes in Galgal4  
30  
31 183 and Galgal5, respectively, only 11,451 Ensembl IDs were shared by both annotations, while  
32  
33 184 5,657 and 14,651 Ensembl IDs were annotated only in the respective builds. Next, we  
34  
35 185 compared the two genome builds based on the genes actually expressed in the early  
36  
37 186 embryo samples of chickens. For this comparison, we filtered out genes with no mapped  
38  
39 187 counts across all 30 RNA-seq samples. As a result, 901 and 3,849 genes were filtered out in  
40  
41 188 the raw gene annotations of Galgal4 and Galgal5, respectively (*i.e.*, 16,207 and 22,253  
42  
43 189 genes remained). Because the same pattern of results was observed when validated with  
44  
45 190 the filtered Ensembl IDs (Fig. 3b), we then examined which RNAs produced the difference  
46  
47 191 between Galgal4 and Galgal5. As a result, many lincRNAs and protein-coding genes were  
48  
49 192 newly identified in Galgal5 and confirmed to be expressed in early chicken embryos (Fig. 3c  
50  
51 193 and Table 2). With the development of sequencing technology, lincRNA has been added to  
52  
53 194 over 5,166 new genes, and it was confirmed that it is actually expressed in our data. Unlike  
54  
55  
56  
57  
58  
59  
60  
61  
62  
63  
64  
65

1 195 lincRNA, which was unilaterally added to Galgal5, there were many changes in protein-  
2  
3 196 coding genes (Table 2). A total of 4,892 protein-coding genes were discarded, while 5,613  
4  
5 197 were added in the new version of the gene annotation (based on the Ensembl ID matching).  
6  
7 198 Since there is still a lack of empirical evidence and practical discussion of the validity of both  
8  
9 199 gene models, it is impossible to determine which genome build is correct for quantifying  
10  
11 200 gene expression in our study. However, we expect to contribute to further studies by  
12  
13 201 providing the entire transcript expression metrics for early embryos of chickens in both builds.  
14  
15 202 Finally, correlations between the 30 samples were examined based on the quantified  
16  
17 203 expression of 11,001 genes common to the gene annotations of these two builds (Fig. 3d).  
18  
19 204 Based on bulked embryo sequencing, high correlations ( $\geq 0.9$ ) were observed between  
20  
21 205 Galgal4 and Galgal5, except for the oocyte and zygote. In comparison, single embryo and/or  
22  
23 206 cell sequencing showed the high correlation between Galgal4 and Galgal5 including the  
24  
25 207 oocyte and zygote. This demonstrates the excellent reproducibility of the data produced  
26  
27 208 based on the unique genetic background of a single experimental subject. Most of the  
28  
29 209 embryonic transcriptome data generated to date have involved pooling problems and we  
30  
31 210 expect to be able to perform more sophisticated downstream analysis using single embryo  
32  
33 211 and/or cell sequencing, which is now possible due to technological developments.  
34  
35  
36  
37  
38  
39  
40

### 41 213 **Comparison of bulked embryo sequencing and single embryo and/or cell sequencing** 42 43 214 **with chicken early embryos**

45 215 To investigate the differences between the two technologies more systematically,  
46  
47 216 multidimensional scaling analysis was performed using information from 30 RNA-seq  
48  
49 217 samples in two gene expression matrixes: Galgal4 and Galgal5. All of the samples in both  
50  
51 218 gene expression matrixes clearly clustered according to their developmental stage, except  
52  
53 219 for the zygote, EGK.I, and EGK.III (Fig. 4). This means that although there are morphological  
54  
55 220 differences, there is no transcriptome change during the early embryonic development of the  
56  
57  
58  
59  
60  
61  
62  
63  
64  
65

1 221 chicken for a specific time after zygotic gene activation. In fact, the time from the zygote to  
2  
3 222 EGK.III is also very short. While most of the patterns seem to be concordant between  
4  
5 223 Galgal4 and Galgal5, distinct differences were observed between the bulked and single  
6  
7 224 embryo RNA-seq techniques for the oocyte and zygote samples based on the Galgal5 gene  
8  
9 225 expression matrix. However, no difference was detected between the two techniques for the  
10  
11 226 EGK.X samples, which is presumably due to the difference between the bulked and single  
12  
13 227 cells because we performed single embryo RNA-seq for the oocyte, zygote, and EGK.X  
14  
15 228 stages. The RNA samples from the oocyte and zygote were derived from a single cell,  
16  
17 229 whereas those from EGK.X were derived from bulked cells. As we have already examined  
18  
19 230 the difference in gene annotation between Galgal4 and Galgal5, more than 10,000 genes  
20  
21 231 have been changed, which includes both protein-coding genes and lincRNAs. Of these  
22  
23 232 changes, 5,166 newly added lincRNAs may be a major factor causing this difference  
24  
25 233 because lincRNA plays an important role in the zygote as an epigenetic marker in both  
26  
27 234 humans and mice, which have been subjected to lincRNA annotation and early embryonic  
28  
29 235 transcription studies. Furthermore, epigenetic markers are very sensitive, exhibiting subject-  
30  
31 236 or cell-specific characteristics. Therefore, our RNA-Seq data based on the single embryo  
32  
33 237 and cell technique for oocytes and zygotes is more accurate than ordinary RNA-Seq data  
34  
35 238 because it eliminates epigenetic and genetic pooling effects. For example, bulked zygote  
36  
37 239 samples were separated from the cluster of EGK.I and EGK.III samples in a  
38  
39 240 multidimensional scaling (MDS) analysis based on the Galgal5 gene matrix, whereas there  
40  
41 241 was no difference in the Galgal4 gene expression matrix (Fig. 4, right panel). This shows that  
42  
43 242 quantifying gene expression using the standard RNA-Seq pooled embryo sequencing  
44  
45 243 technique can lead to false positive results regarding differentially expressed genes.  
46  
47  
48  
49  
50  
51

52 244 In summary, we produced the first whole transcriptome sequences of pre-oviposited  
53  
54 245 early chicken embryos based on standard RNA-Seq and single embryo sequencing  
55  
56 246 techniques. We then quantified and compared gene expression using the standard gene  
57  
58  
59  
60  
61  
62  
63  
64  
65



1 247 annotation used for the chicken and a new chicken gene annotation based on the advanced  
2  
3 248 long-read sequencing technique. As a result, we not only demonstrated the accuracy of  
4  
5 249 RNA-Seq data based on single embryo or cell sequencing but also successfully quantified  
6  
7 250 5,166 lincRNAs in the new chicken gene model, for the pre-oviposited early chicken embryo.  
8  
9  
10 251 We expect that the transcriptome sequences of pre-oviposited early chicken embryos will fill  
11  
12 252 the gap in comparative developmental and evolutionary studies of vertebrates as a valuable  
13  
14 253 resources and provide comprehensive knowledge of early avian embryogenesis.  
15  
16 254 Furthermore, the oocyte and early chicken embryos express numerous types of RNA,  
17  
18 255 including mRNA and lincRNA, so our dataset should help to establish novel transcript and  
19  
20  
21 256 gene annotations for the chicken reference genome. Our large dataset should also be useful  
22  
23 257 for future studies of avian and comparative genomics because the data were generated  
24  
25 258 using the latest sequencing platform and whole transcriptome sequencing enabling the  
26  
27  
28 259 characterization of all RNA transcripts, including primary transcripts, regardless of  
29  
30 260 polyadenylation.

### 31 32 261 33 34 262 **Availability of supporting data**

35  
36 263 The bulked and single embryo RNA-Seq data have been deposited in the NCBI GEO  
37  
38 264 database (GSE86592 and GSE100798, respectively). Supporting data including pre-  
39  
40 265 processed gene expression levels are also available in the GigaScience database (GigaDB).

### 41 266 42 43 267 **Abbreviations**

44  
45 268 EGK: Eyal-giladi and Kochav; lincRNA: long intergenic non-coding RNA; MDS:  
46  
47 269 multidimensional scaling; PacBio: Pacific Biosciences; RNA-Seq: RNA-sequencing; WL:  
48  
49 270 white leghorn.

### 50 271 51 52 272 **Experimental animals and animal care**

1 273 The care and experimental use of chickens were approved by the Institute of Laboratory  
2  
3 274 Animal Resources, Seoul National University (SNU-150827-1). Chickens were maintained  
4  
5 275 according to a standard management program at the University Animal Farm, Seoul National  
6  
7 276 University, Korea. The procedures for animal management, reproduction and embryo  
8  
9  
10 277 manipulation adhered to the standard operating protocols of our laboratory.  
11

12 278

### 14 279 **Competing interests**

16 280 The authors declare that they have no competing interests.  
17  
18

19 281

### 21 282 **Funding**

23 283 This work was supported by the National Research Foundation of Korea (NRF) grant funded  
24  
25 284 by the Korea government (MSIP) (No. NRF-2015R1A3A2033826).  
26

27 285

### 30 286 **Authors' contributions**

32 287 YSH and JYH conceived and designed the experiments. YSH, HJC, and SKK collected  
33  
34 288 embryos. YSH prepared RNA samples and generated whole-transcriptome RNA-seq reads.  
35  
36 289 YSH, MS, HK, and JYH analyzed and wrote the manuscript. All authors read and edited the  
37  
38  
39 290 manuscript.  
40

41 291

### 43 292 **Author details**

45 293 <sup>1</sup>Department of Agricultural Biotechnology and Research Institute of Agriculture and Life  
46  
47 294 Sciences, Seoul National University, Seoul 08826, Korea. <sup>2</sup>CHO&KIM genomics, SNU  
48  
49 295 Research Park, Seoul National University Mt.4-2, Seoul 08826, Korea. <sup>3</sup>Channing Division of  
50  
51 296 Network Medicine, Harvard Medical School and Brigham and Women's Hospital, Boston,  
52  
53  
54 297 Massachusetts, USA. <sup>4</sup>Institute for Biomedical Sciences, Shinshu University, Minamiminowa,  
55  
56 298 Nagano 399-4598, Japan.  
57

1 299

2

3 300 **References**

4

5 301

6 302

7 303

8 304

9 305

10 306

11 307

12 308

13 309

14 310

15 311

16 312

17 313

18 314

19 315

20 316

21 317

22 318

23 319

24 320

25 321

26 322

27 323

28 324

29 325

30 326

31 327

32 328

33 329

34 330

35 331

36 332

37 333

38 334

39 335

40 336

41 337

42 338

43 339

44 340

45 341

46 342

47 343

48 344

49 345

50 346

51 347

52

53

54

55

56

57

58

59

60

61

62

63

64

65

1. Kispert A, Ortner H, Cooke J and Herrmann BG. The chick Brachyury gene: developmental expression pattern and response to axial induction by localized activin. *Dev Biol.* 1995;168 2:406-15. doi:10.1006/dbio.1995.1090.
2. Streit A, Berliner AJ, Papanayotou C, Sirulnik A and Stern CD. Initiation of neural induction by FGF signalling before gastrulation. *Nature.* 2000;406 6791:74-8. doi:10.1038/35017617.
3. Skromne I and Stern CD. Interactions between Wnt and Vg1 signalling pathways initiate primitive streak formation in the chick embryo. *Development.* 2001;128 15:2915-27.
4. Torlopp A, Khan MA, Oliveira NM, Lekk I, Soto-Jimenez LM, Sosinsky A, et al. The transcription factor Pitx2 positions the embryonic axis and regulates twinning. *Elife.* 2014;3:e03743. doi:10.7554/eLife.03743.
5. Eyal-Giladi H and Kochav S. From cleavage to primitive streak formation: a complementary normal table and a new look at the first stages of the development of the chick. I. General morphology. *Dev Biol.* 1976;49 2:321-37.
6. Kochav S, Ginsburg M and Eyal-Giladi H. From cleavage to primitive streak formation: a complementary normal table and a new look at the first stages of the development of the chick. II. Microscopic anatomy and cell population dynamics. *Dev Biol.* 1980;79 2:296-308.
7. Park HJ, Park TS, Kim TM, Kim JN, Shin SS, Lim JM, et al. Establishment of an in vitro culture system for chicken preblastodermal cells. *Mol Reprod Dev.* 2006;73 4:452-61. doi:10.1002/mrd.20441.
8. Jarvis ED, Mirarab S, Aberer AJ, Li B, Houde P, Li C, et al. Whole-genome analyses resolve early branches in the tree of life of modern birds. *Science.* 2014;346 6215:1320-31. doi:10.1126/science.1253451.
9. Zhang G, Li C, Li Q, Li B, Larkin DM, Lee C, et al. Comparative genomics reveals insights into avian genome evolution and adaptation. *Science.* 2014;346 6215:1311-20. doi:10.1126/science.1251385.
10. Zhang G, Li B, Li C, Gilbert MT, Jarvis ED, Wang J, et al. Comparative genomic data of the Avian Phylogenomics Project. *Gigascience.* 2014;3 1:26. doi:10.1186/2047-217X-3-26.
11. Lee HC, Choi HJ, Park TS, Lee SI, Kim YM, Rengaraj D, et al. Cleavage events and sperm dynamics in chick intrauterine embryos. *PLoS One.* 2013;8 11:e80631. doi:10.1371/journal.pone.0080631.
12. Bolger AM, Lohse M and Usadel B. Trimmomatic: a flexible trimmer for Illumina sequence data. *Bioinformatics.* 2014:btu170.
13. Andrews S. FastQC: A quality control tool for high throughput sequence data. Reference Source. 2010.
14. Durruthy-Durruthy J, Sebastiano V, Wossidlo M, Cepeda D, Cui J, Grow EJ, et al. The primate-specific noncoding RNA HPAT5 regulates pluripotency during human preimplantation development and nuclear reprogramming. *Nat Genet.* 2016;48 1:44-52. doi:10.1038/ng.3449.
15. Jeong H, Sung S, Kwon T, Seo M, Caetano-Anollés K, Choi SH, et al. HGTree: database of horizontally transferred genes determined by tree reconciliation. *Nucleic acids research.* 2015;44 D1:D610-D9.
16. Li H, Handsaker B, Wysoker A, Fennell T, Ruan J, Homer N, et al. The sequence alignment/map format and SAMtools. *Bioinformatics.* 2009;25 16:2078-9.

1 348 17. Love MI, Huber W and Anders S. Moderated estimation of fold change and  
2 349 dispersion for RNA-seq data with DESeq2. Genome biology. 2014;15 12:550.  
3  
4 350  
5  
6 351  
7  
8  
9  
10  
11  
12  
13  
14  
15  
16  
17  
18  
19  
20  
21  
22  
23  
24  
25  
26  
27  
28  
29  
30  
31  
32  
33  
34  
35  
36  
37  
38  
39  
40  
41  
42  
43  
44  
45  
46  
47  
48  
49  
50  
51  
52  
53  
54  
55  
56  
57  
58  
59  
60  
61  
62  
63  
64  
65

16  
17  
18  
19  
20  
21  
22  
23  
24  
25  
26  
27  
28  
29  
30  
31  
32  
33  
34  
35  
36  
37  
38  
39  
40  
41  
42  
43  
44  
45  
46  
47  
48  
49  
50  
51  
52  
53  
54  
55  
56  
57  
58  
59  
60  
61  
62  
63  
64  
65

352 **Table 1.** Summary statistics of the RNA-seq processing

| Bulked embryonic sequencing |                 |                 |                         |                         |
|-----------------------------|-----------------|-----------------|-------------------------|-------------------------|
| Samples                     | Surviving reads | Surviving rates | Mapping rates (Galgal4) | Mapping rates (Galgal5) |
| Oocyte_S1_Bulked            | 56024575        | 94.81%          | 82.73%                  | 84.32%                  |
| Oocyte_S2_Bulked            | 56043780        | 94.14%          | 82.77%                  | 79.54%                  |
| Oocyte_S3_Bulked            | 59498675        | 95.54%          | 82.16%                  | 82.39%                  |
| Zygote_S1_Bulked            | 53378148        | 96.74%          | 82.43%                  | 85.89%                  |
| Zygote_S2_Bulked            | 53999584        | 96.77%          | 82.19%                  | 79.86%                  |
| Zygote_S3_Bulked            | 50027929        | 98.02%          | 80.90%                  | 87.58%                  |
| EGK.I_S1_Bulked             | 56909314        | 97.36%          | 74.55%                  | 70.70%                  |
| EGK.I_S2_Bulked             | 61447014        | 97.94%          | 73.24%                  | 68.64%                  |
| EGK.I_S3_Bulked             | 50188847        | 96.80%          | 81.34%                  | 77.01%                  |
| EGK.III_S1_Bulked           | 60876681        | 97.30%          | 76.06%                  | 69.37%                  |
| EGK.III_S2_Bulked           | 56357690        | 97.90%          | 75.20%                  | 70.47%                  |
| EGK.III_S3_Bulked           | 45715485        | 98.02%          | 75.30%                  | 70.38%                  |
| EGK.VI_S1_Bulked            | 62075038        | 97.53%          | 71.14%                  | 63.68%                  |
| EGK.VI_S2_Bulked            | 65223164        | 97.77%          | 80.95%                  | 72.89%                  |
| EGK.VI_S3_Bulked            | 49604292        | 98.16%          | 75.12%                  | 69.22%                  |
| EGK.VIII_S1_Bulked          | 67401388        | 97.35%          | 70.10%                  | 67.32%                  |
| EGK.VIII_S2_Bulked          | 56396268        | 96.82%          | 66.53%                  | 60.37%                  |
| EGK.VIII_S3_Bulked          | 71309063        | 97.44%          | 70.68%                  | 70.70%                  |
| EGK.X_S1_Bulked             | 67730502        | 95.70%          | 72.24%                  | 69.29%                  |
| EGK.X_S2_Bulked             | 74109500        | 95.02%          | 70.64%                  | 69.62%                  |

16  
17  
18  
19  
20  
21  
22  
23  
24  
25  
26  
27  
28  
29  
30  
31  
32  
33  
34  
35  
36  
37  
38  
39  
40  
41  
42  
43  
44  
45  
46  
47  
48  
49  
50  
51  
52  
53  
54  
55  
56  
57  
58  
59  
60  
61  
62  
63  
64  
65

|                                            |             |             |             |             |
|--------------------------------------------|-------------|-------------|-------------|-------------|
| EGK.X_S3_Bulked                            | 63225919    | 94.65%      | 71.13%      | 69.51%      |
| <b>Average</b>                             | 58930612.19 | 0.967514286 | 0.760666667 | 0.732738095 |
| <b>Single embryonic or cell sequencing</b> |             |             |             |             |
| Oocyte_S1_SingleCell                       | 23558381    | 86.61%      | 86.28%      | 86.67%      |
| Oocyte_S2_SingleCell                       | 53963445    | 84.75%      | 85.95%      | 85.86%      |
| Oocyte_S3_SingleCell                       | 24660386    | 84.95%      | 84.95%      | 84.33%      |
| Zygote_S1_SingleEmbryo                     | 31742857    | 87.17%      | 84.32%      | 84.40%      |
| Zygote_S2_SingleEmbryo                     | 91033778    | 85.72%      | 76.59%      | 76.15%      |
| Zygote_S3_SingleEmbryo                     | 27687195    | 87.60%      | 86.02%      | 85.96%      |
| EGK.X_S1_SingleEmbryo                      | 30914824    | 86.41%      | 83.67%      | 83.16%      |
| EGK.X_S2_SingleEmbryo                      | 47159061    | 86.29%      | 88.38%      | 89.10%      |
| EGK.X_S3_SingleEmbryo                      | 29006546    | 85.94%      | 83.57%      | 82.86%      |
| <b>Average</b>                             | 39969608.11 | 0.8616      | 0.844144444 | 0.842766667 |

353

354

1 355 **Table 2.** Comparison of Galgal4 and Galgal5 gene annotations

| <b>RNAs</b>    | <b>Annotated<br/>in Galgal4 only</b> | <b>Commonly<br/>annotated</b> | <b>Annotated<br/>in Galgal5 only</b> |
|----------------|--------------------------------------|-------------------------------|--------------------------------------|
| lincRNA        | 0                                    | 0                             | 5,166                                |
| miRNA          | 204                                  | 487                           | 253                                  |
| misc_RNA       | 15                                   | 71                            | 43                                   |
| Mt_rRNA        | 2                                    | 0                             | 2                                    |
| Mt_tRNA        | 10                                   | 0                             | 14                                   |
| protein_coding | 4,892                                | 10,213                        | 5,613                                |
| pseudogene     | 29                                   | 10                            | 25                                   |
| rRNA           | 6                                    | 8                             | 58                                   |
| scaRNA         | 0                                    | 0                             | 4                                    |
| snoRNA         | 41                                   | 172                           | 44                                   |
| snRNA          | 7                                    | 40                            | 30                                   |
| Total          | 5,206                                | 11,001                        | 11,252                               |

24 356

26 357

1 358 **Figure legends**

2  
3 359 **Fig. 1.** The bulked and single embryonic RNA-Sequencing (RNA-Seq) in early chicken  
4  
5 360 development. a) The diagram of bulked embryonic RNA-seq. Total 137 pre-oviposited  
6  
7 361 embryos were collected. Each replicate contains from three to ten embryos pooled. The  
8  
9 362 bulked embryo RNA-Seq was performed in triplicate. b) The diagram of single embryonic  
10  
11 363 RNA-Seq. The single oocyte, zygote, and Eyal-giladi and Kochav stage X (EGK.X)  
12  
13 364 blastoderm were obtained from one hen simultaneously. Samples was collected from three  
14  
15 365 hen. Single embryo was sequenced as one replicate and each stage consists of triplicated  
16  
17 366 embryos from three hen, respectively. c) The representative stages of chicken early embryos  
18  
19 367 used for RNA-Seq. Dorsal views of whole embryos from the oocyte to EGK.X are shown. A  
20  
21 368 germinal vesicle oocyte in the ovary and fertilized zygote in the magnum without cleavage  
22  
23 369 were obtained. The intrauterine embryos were obtained 5.5 (EGK.I), 8.5 (EGK.III), 15.5  
24  
25 370 (EGK.VI), and 20.5 (EGK.VIII) h after fertilization. The EGK.X embryo was obtained after  
26  
27 371 oviposition. Scale bar, 1000  $\mu\text{m}$ .  
28  
29  
30  
31

32 372  
33  
34 373 **Fig. 2.** Collection of bulked and single embryos during early chicken development. a) The  
35  
36 374 number of embryos in each sample. b) The RNA concentration and c) total amount of RNA  
37  
38 375 for each stage used in RNA-Seq. d) The estimated total RNA per embryo in the bulked  
39  
40 376 samples and the total amount of RNA in a single embryo. The RNA concentration, amount of  
41  
42 377 RNA, and total RNA per embryo did not differ significantly among the groups (Kruskal–Wallis  
43  
44 378 test,  $P > 0.05$ ).  
45  
46  
47

48 379  
49  
50 380 **Fig. 3.** Comparison of two different builds of gene annotation for the early chicken embryo  
51  
52 381 samples. a) Using the Ensembl annotation with the two different genome builds, annotated  
53  
54 382 genes were compared based on the Ensembl ID. As a result, 5,657 and 14,651 Ensembl IDs  
55  
56 383 were identified in Galgal4 and Galgal5, respectively, while 11,451 Ensembl IDs are common  
57  
58



1 384 to the two different annotations. b) Based on the expressed genes at any stage of the  
2  
3 385 chicken early embryos, the gene lists were compared between Galgal4 and Galgal5. c)  
4  
5 386 Investigation of the change in annotated genes in Galgal5 among genes expressed in early  
6  
7 387 chicken embryos. As a result, a large number of lincRNAs was added as new features in  
8  
9  
10 388 Galgal5. d) A correlation analysis of the total gene expression based on 11,001 common  
11  
12 389 annotated genes shared between Galgal4 and Galgal5.

13  
14  
15 390

16 391 **Fig. 4.** Multidimensional scaling plots based on all annotated genes in Galgal4 and Galgal5.  
17  
18  
19 392 The gene expression patterns of early chicken embryos quantified based on Galgal4 were  
20  
21 393 clearly differentiated by developmental stage regardless of the sequencing technique used.  
22  
23 394 In comparison, there was a difference between the bulked and single embryo sequencing  
24  
25 395 techniques in the oocyte and zygote in Galgal5.

26  
27  
28  
29  
30  
31  
32  
33  
34  
35  
36  
37  
38  
39  
40  
41  
42  
43  
44  
45  
46  
47  
48  
49  
50  
51  
52  
53  
54  
55  
56  
57  
58  
59  
60  
61  
62  
63  
64  
65

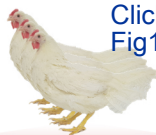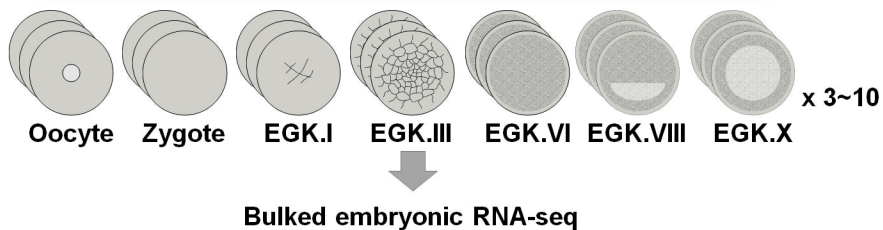**b**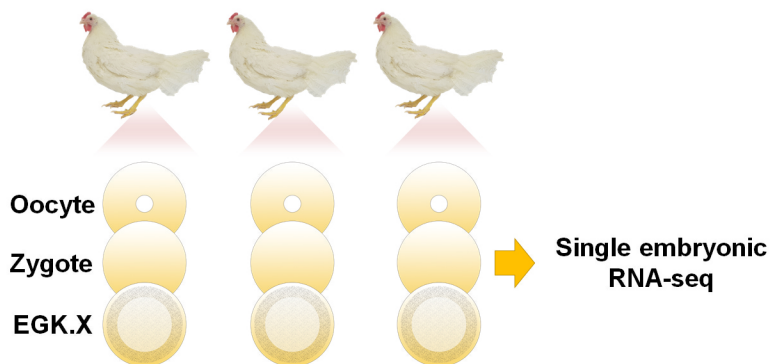**c**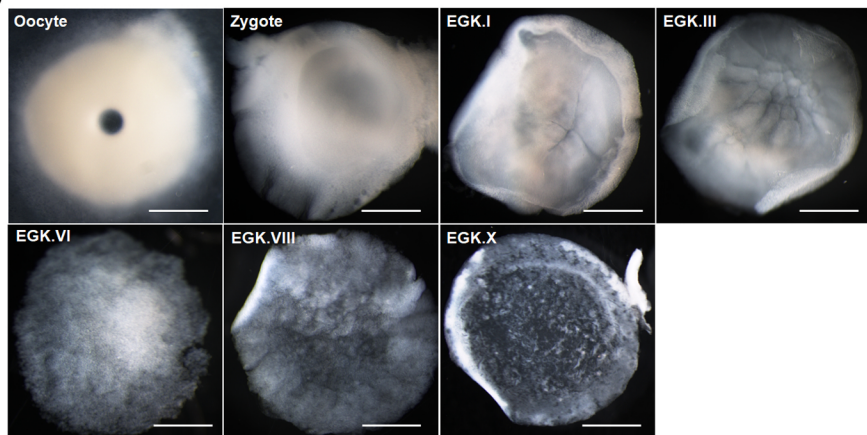

Figure 2

[Click here to download Figure Fig2.pdf](#)
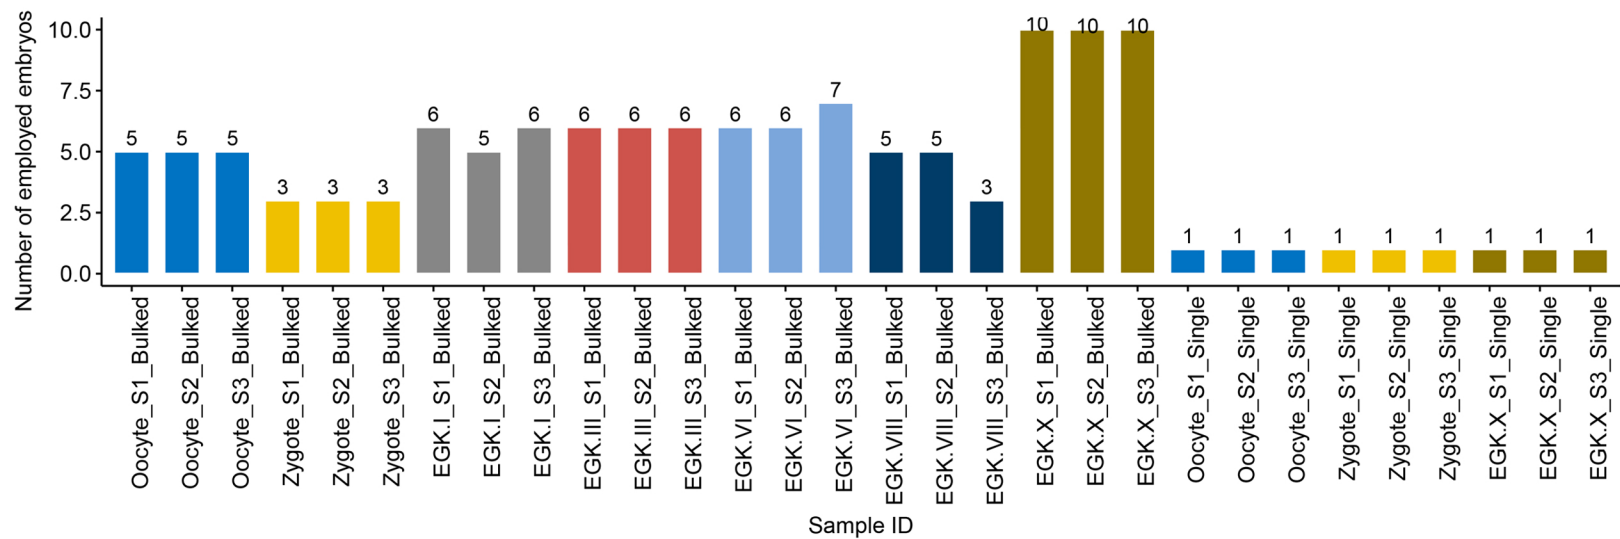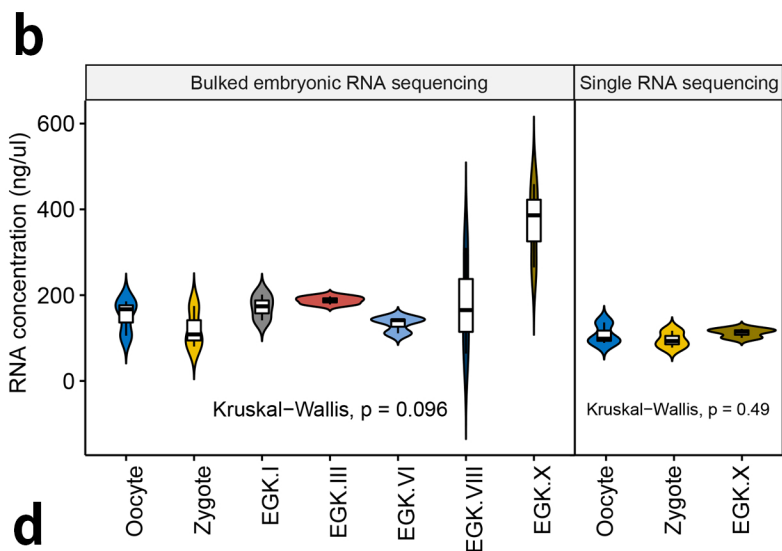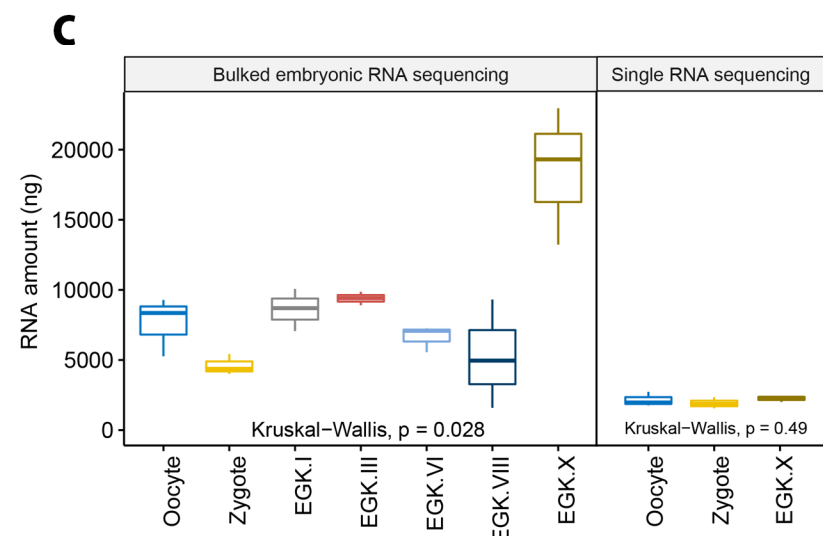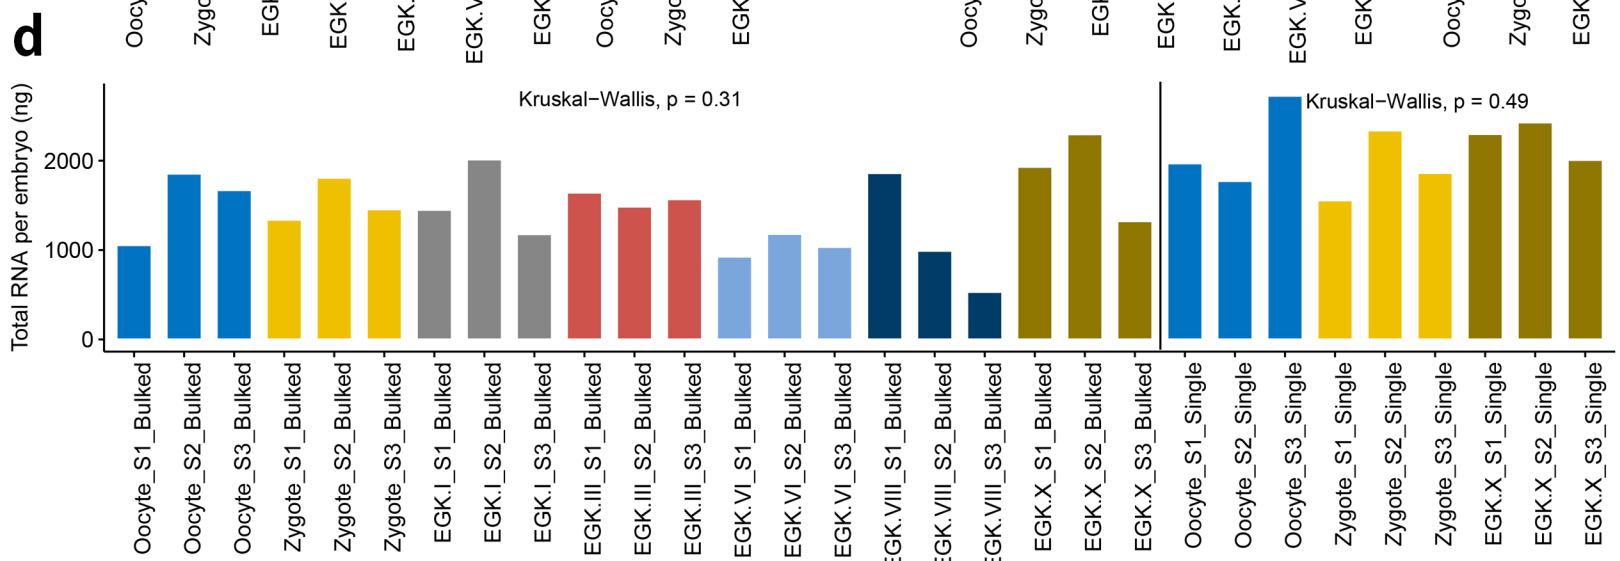

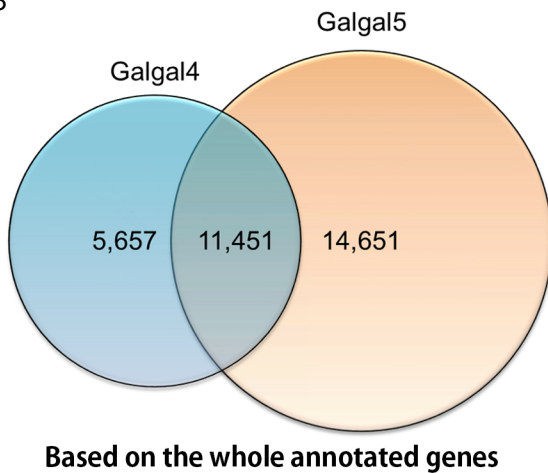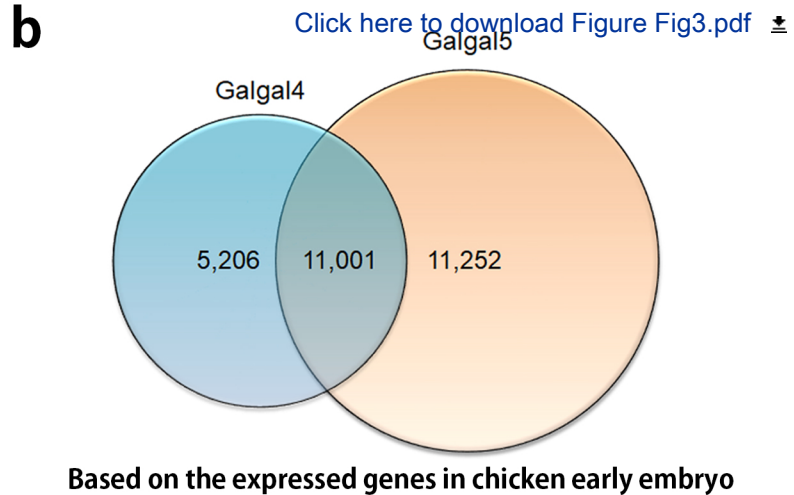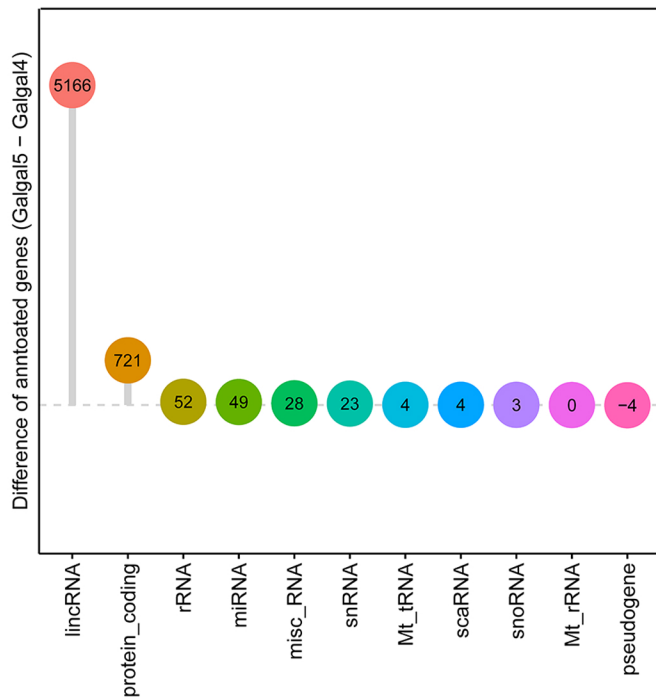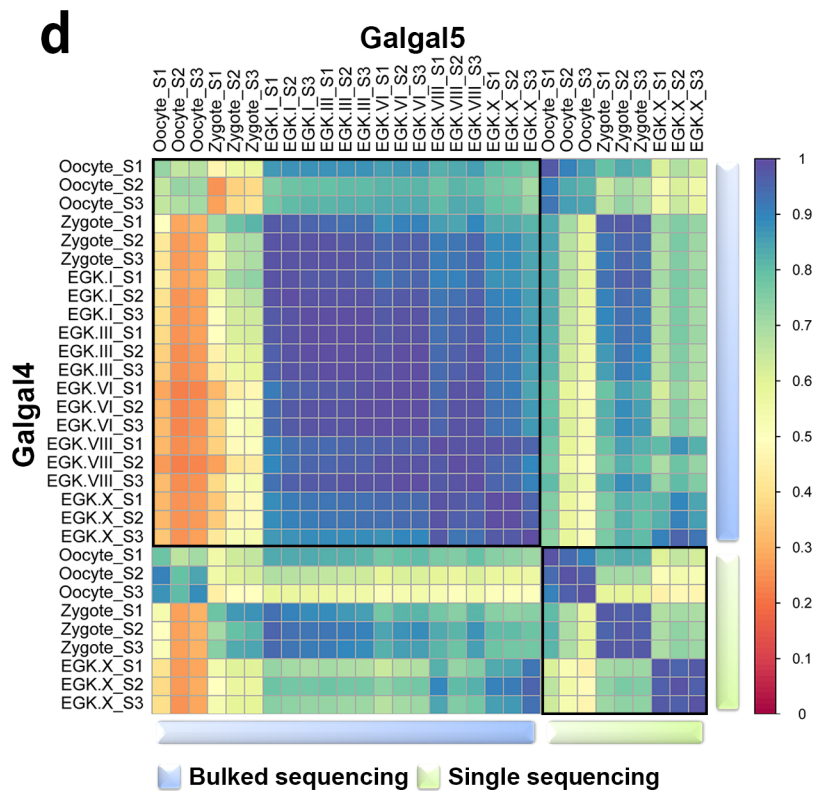

Figure 4

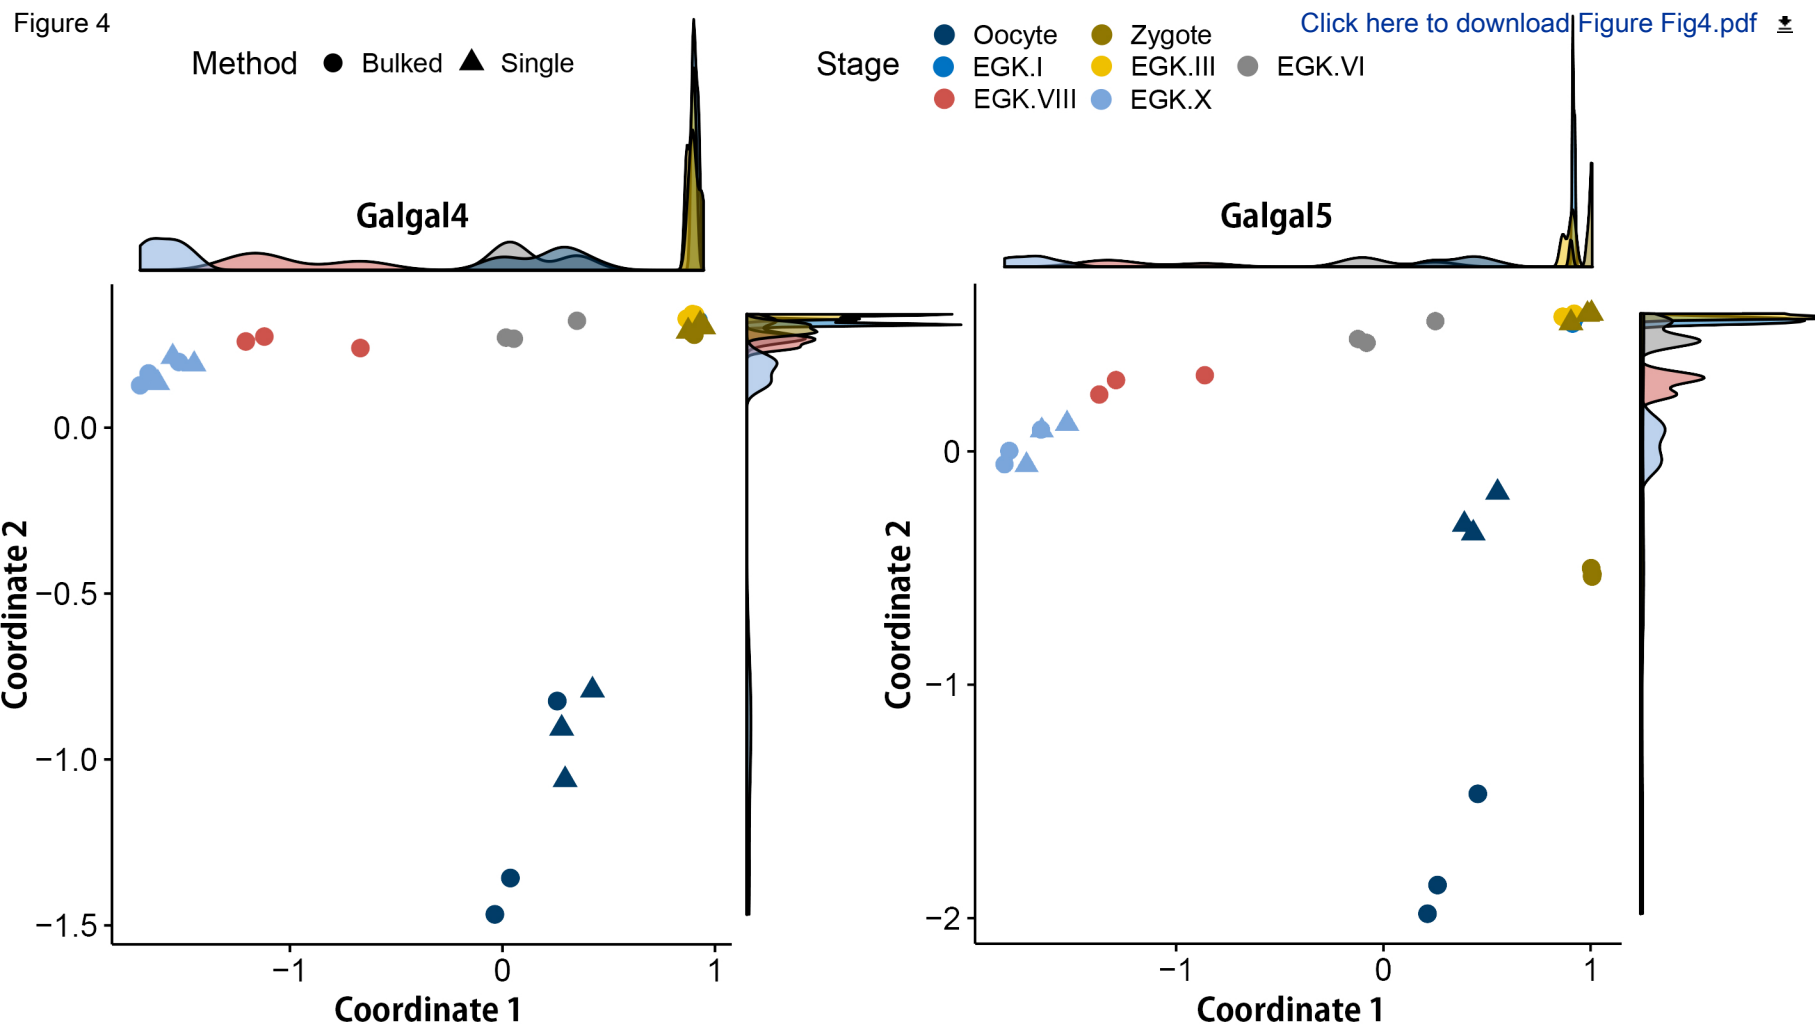

[Click here to download Figure Fig4.pdf](#)
